# Supplementary material for: Ligand bias underlies differential signaling of multiple FGFs via FGFR1
Source: PubMed Central journal article supplement (PMC10990489; doi:10.7554/elife.88144), 2024-04-03

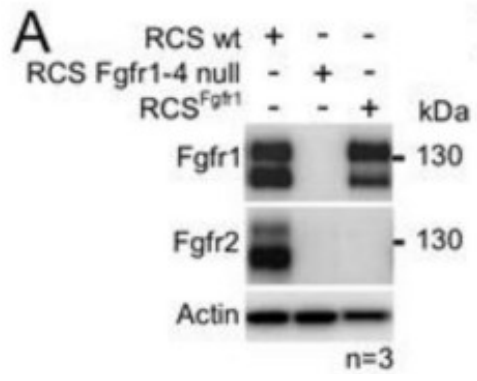

|                      |   |   |   |   |   |   |   |   |   |
|----------------------|---|---|---|---|---|---|---|---|---|
| RCS wt               | + | - | - | + | - | - | + | - | - |
| RCS Fgfr1-4 null     | - | + | - | - | + | - | - | + | - |
| RCS <sup>Fgfr1</sup> | - | - | + | - | - | + | - | - | + |

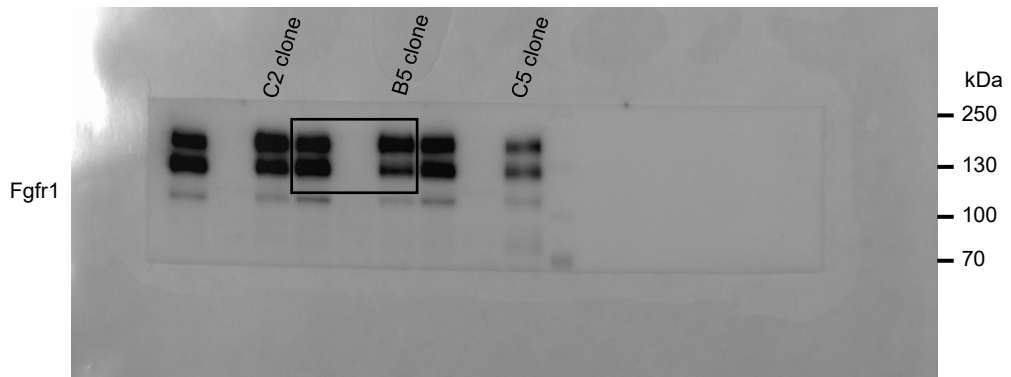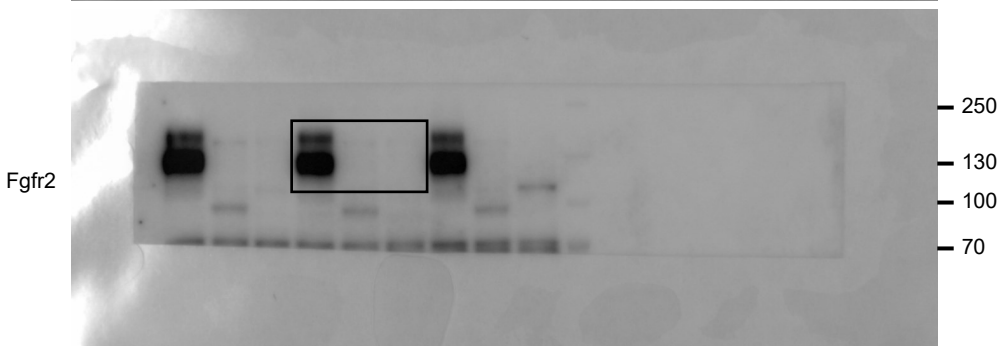

|                      |   |   |   |   |   |   |   |   |   |
|----------------------|---|---|---|---|---|---|---|---|---|
| RCS wt               | + | - | - | + | - | - | + | - | - |
| RCS Fgfr1-4 null     | - | + | - | - | + | - | - | + | - |
| RCS <sup>Fgfr1</sup> | - | - | + | - | - | + | - | - | + |

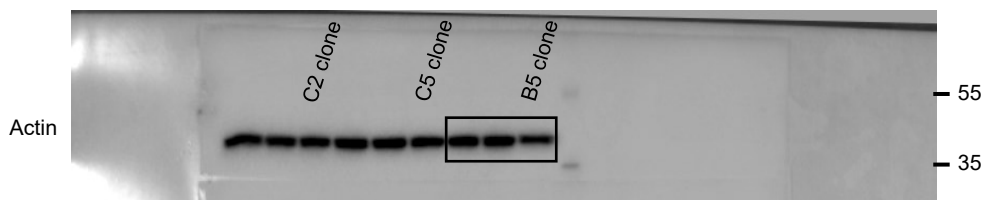

Supplement: elife-88144-fig1-data2.pdf [file elife-88144-fig1-data2.pdf]
