# Supplementary material for: Ligand bias underlies differential signaling of multiple FGFs via FGFR1
Source: PubMed Central journal article supplement (PMC10990489; doi:10.7554/elife.88144), 2024-04-03

**A**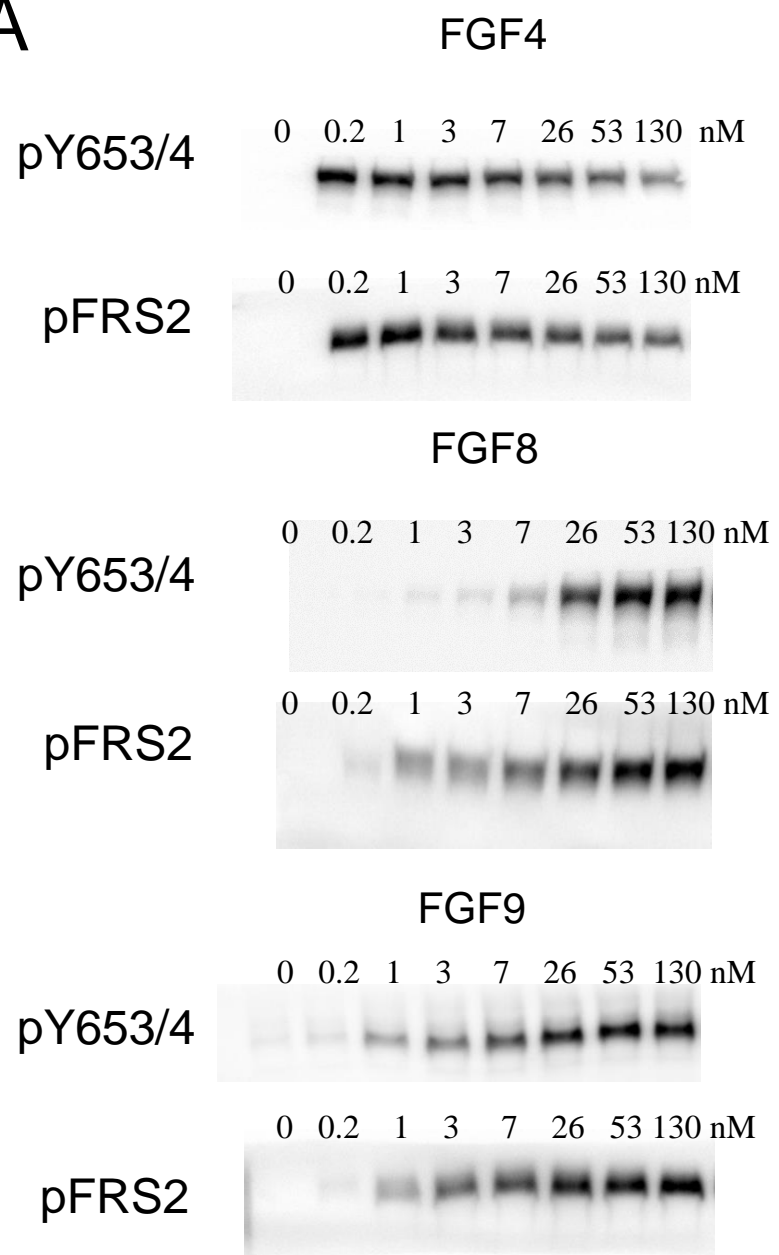**B**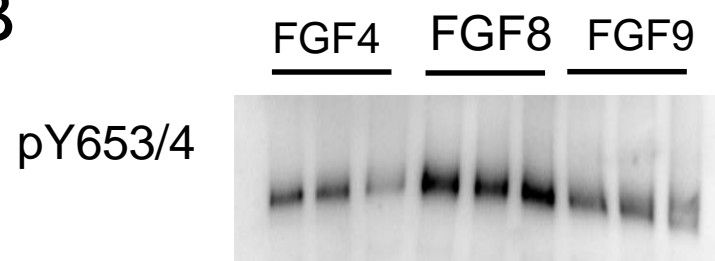**FGF4**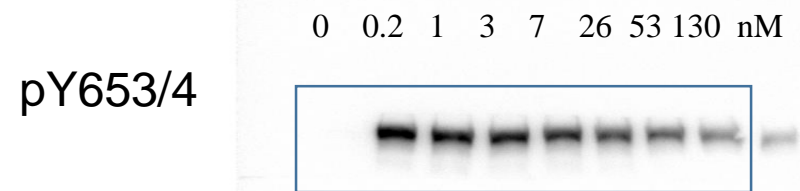**pFRS2**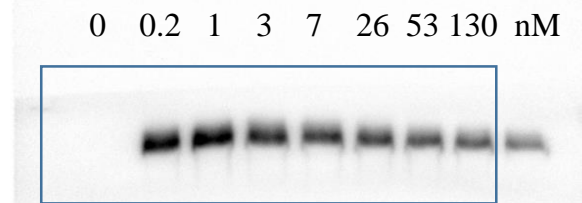**FGF8****pY653/4**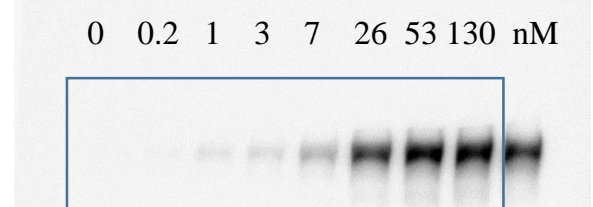**pFRS2**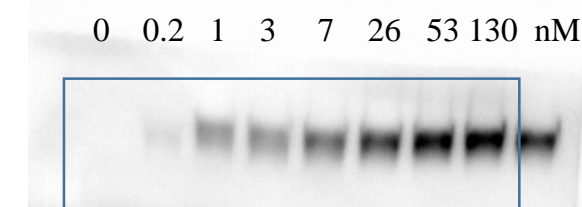**FGF9****pY653/4**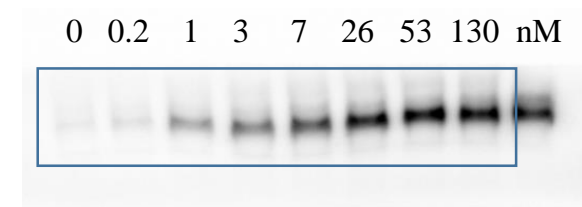**pFRS2**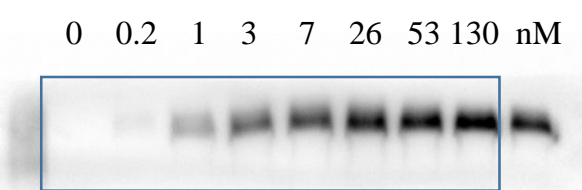FGF4 FGF8 FGF9**pY653/4**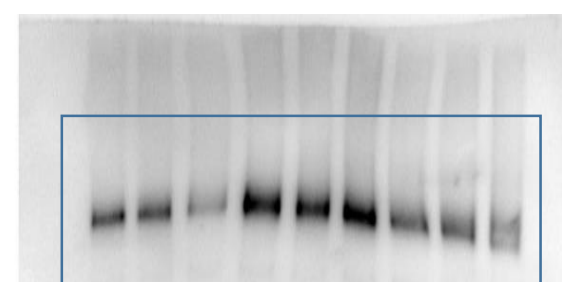

Supplement: elife-88144-fig3-data1.pdf [file elife-88144-fig3-data1.pdf]
