# Supplementary material for: Ligand bias underlies differential signaling of multiple FGFs via FGFR1
Source: PubMed Central journal article supplement (PMC10990489; doi:10.7554/elife.88144), 2024-04-03

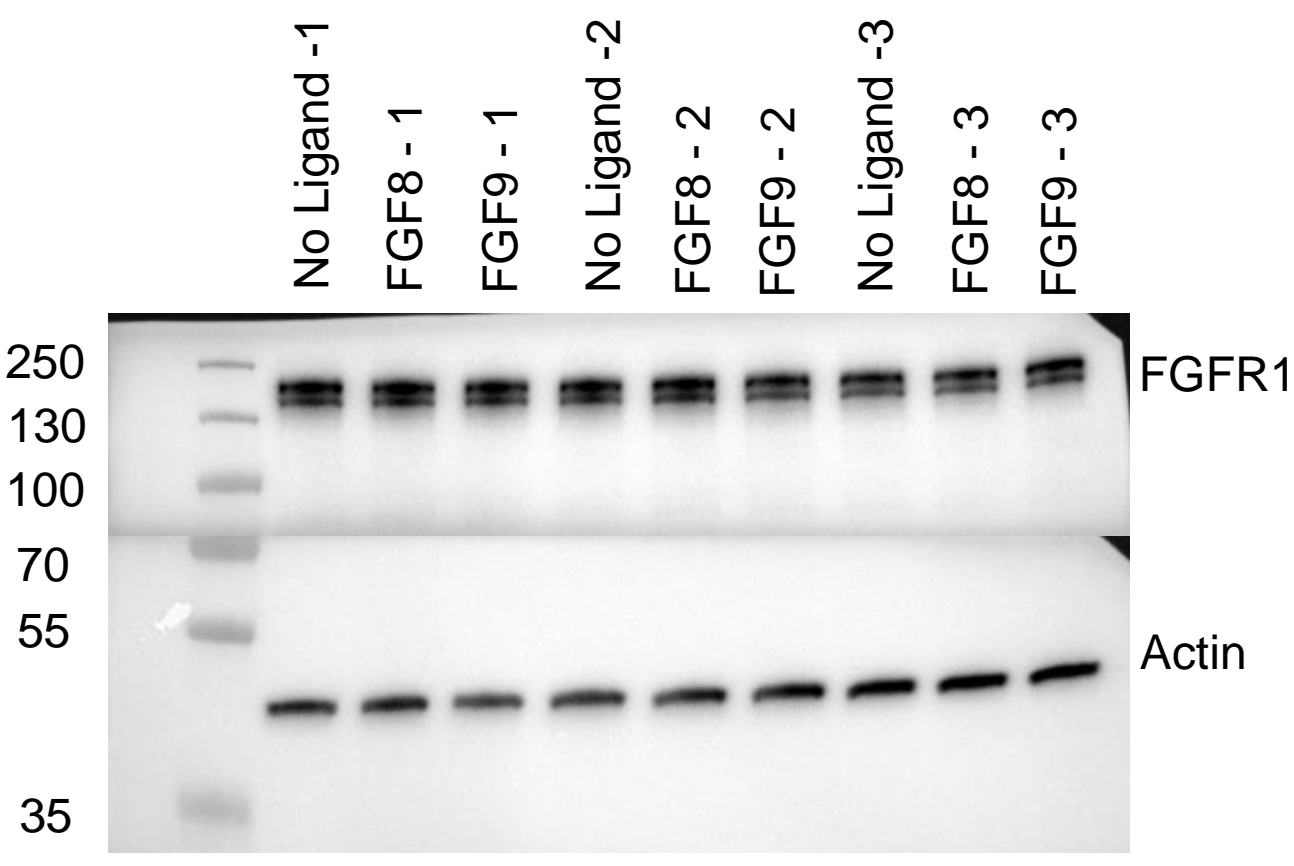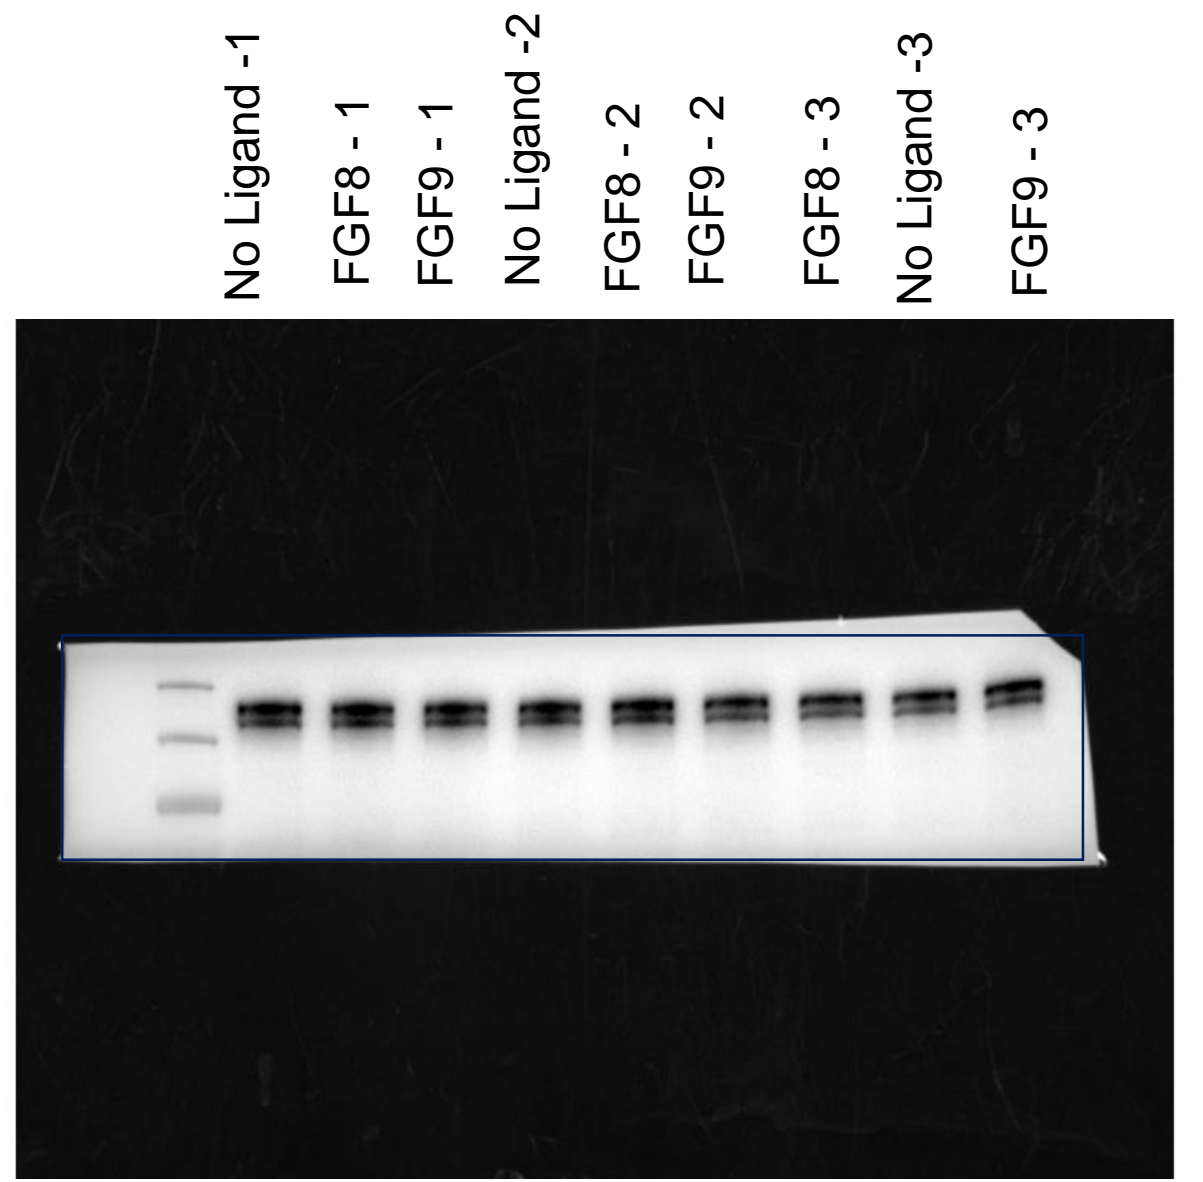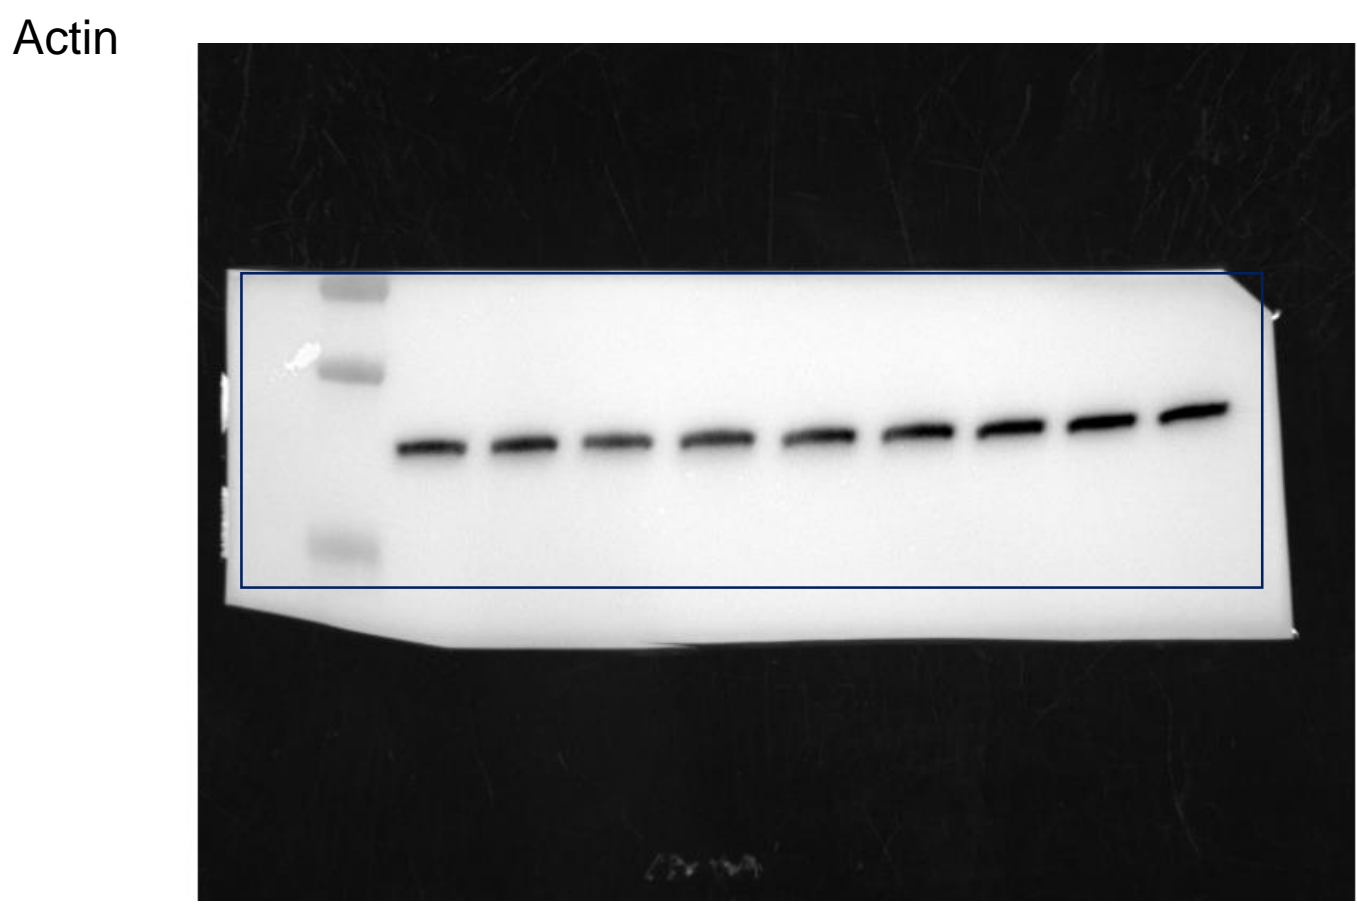

Supplement: elife-88144-fig5-figsupp1-data2.pdf [file elife-88144-fig5-figsupp1-data2.pdf]
