# Supplementary material for: Ligand bias underlies differential signaling of multiple FGFs via FGFR1
Source: eLife journal article supplement (doi:10.7554/elife.88144), 2023-06-06

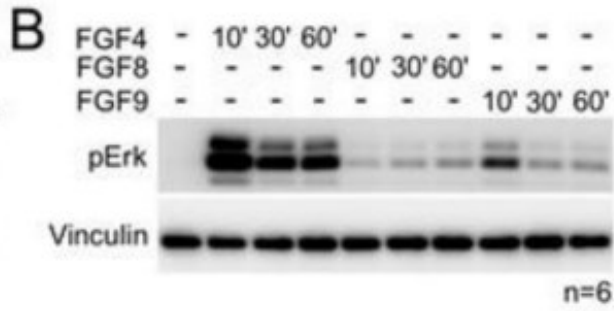

|      |   |     |     |     |     |     |     |     |     |     |
|------|---|-----|-----|-----|-----|-----|-----|-----|-----|-----|
| FGF4 | - | 10' | 30' | 60' | -   | -   | -   | -   | -   | -   |
| FGF8 | - | -   | -   | -   | 10' | 30' | 60' | -   | -   | -   |
| FGF9 | - | -   | -   | -   | -   | -   | -   | 10' | 30' | 60' |

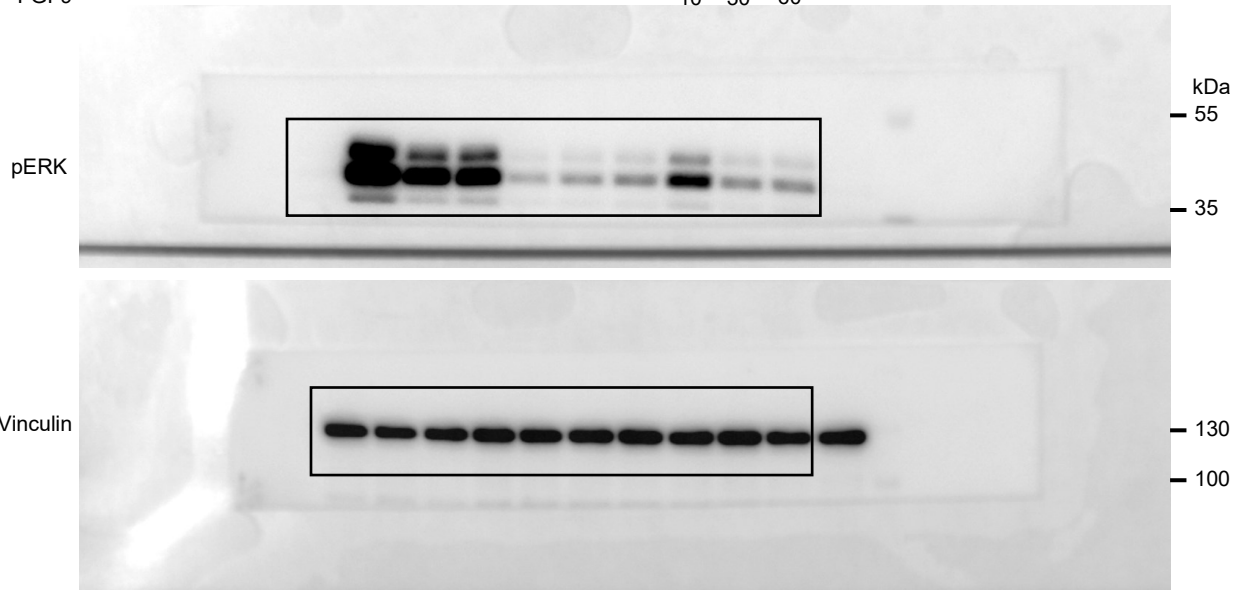

Supplement: fig1-data4 [file elife-88144-fig1-data4-v1.pdf]
