# Supplementary material for: Ligand bias underlies differential signaling of multiple FGFs via FGFR1
Source: eLife journal article supplement (doi:10.7554/elife.88144), 2023-06-06

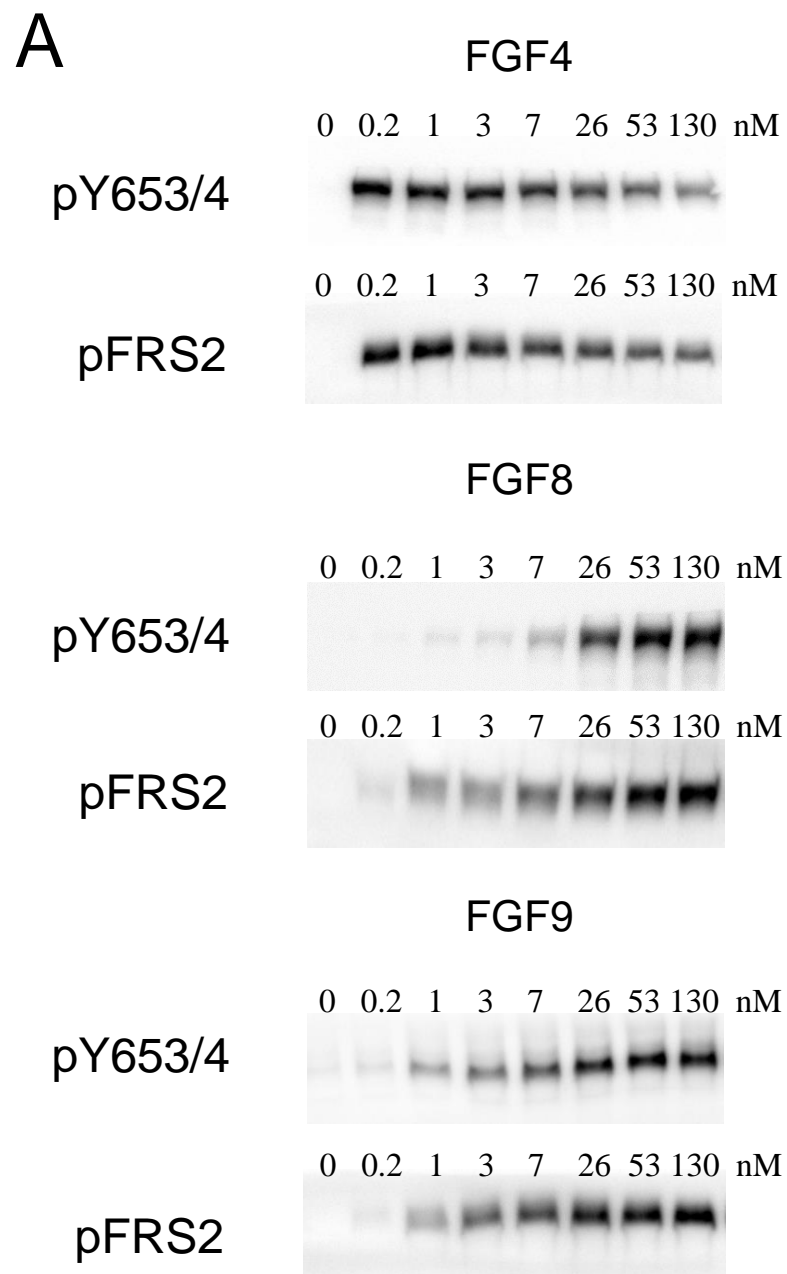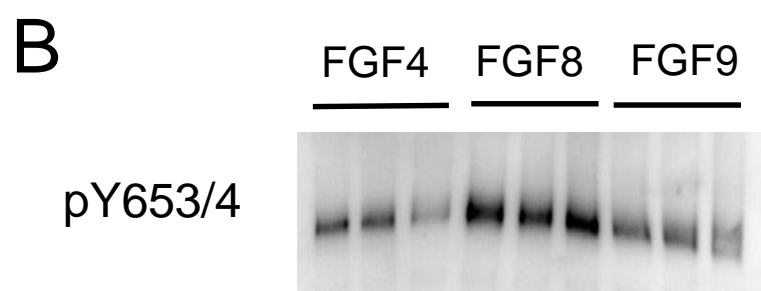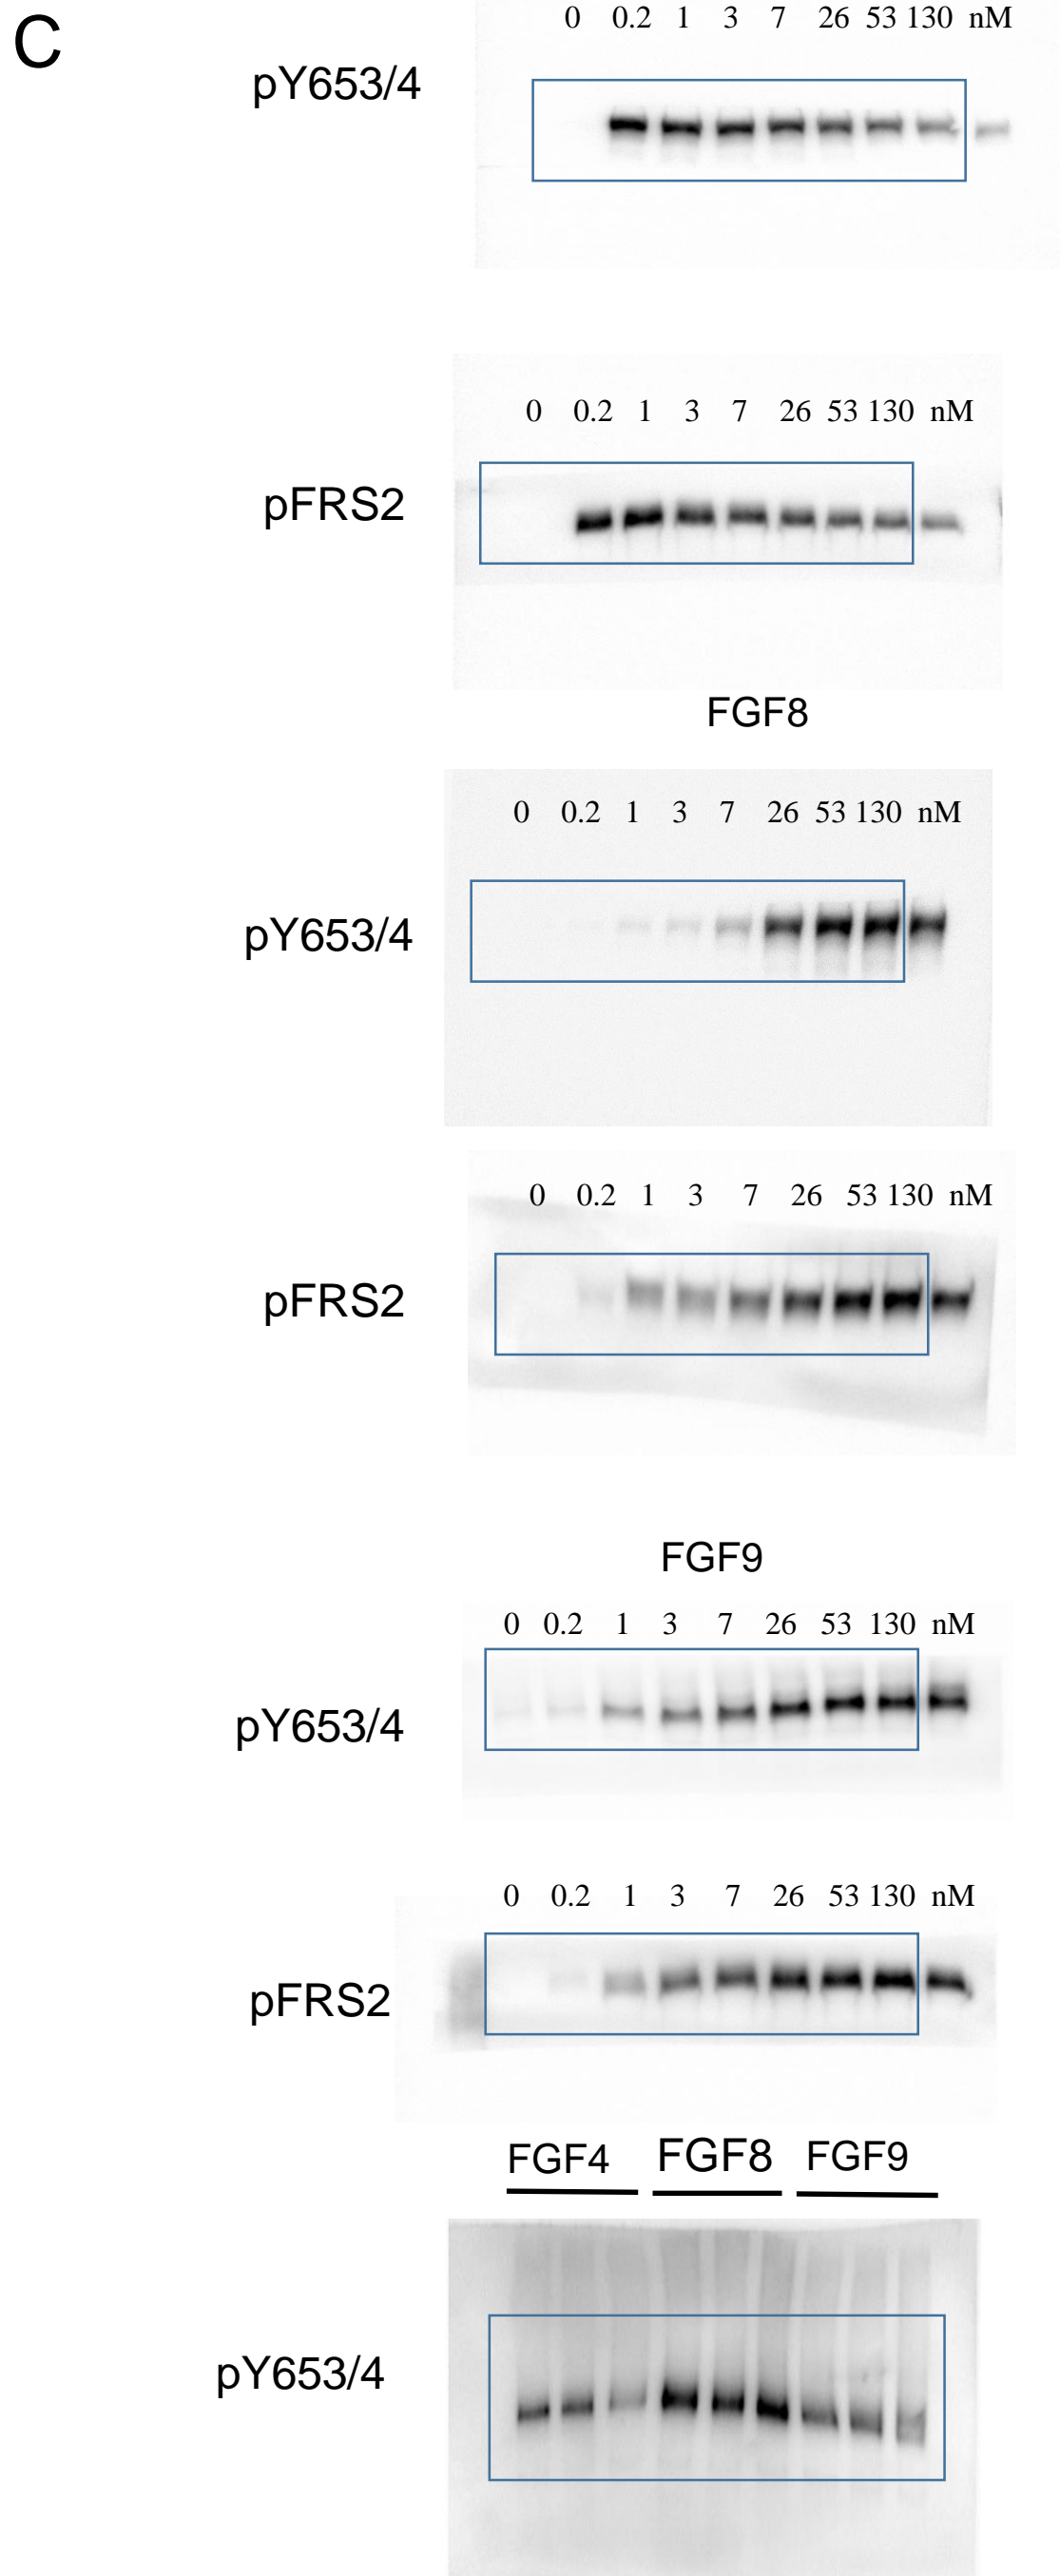

Supplement: fig3-data2 [file elife-88144-fig3-data2-v2.pdf]
