# Supplementary material for: Ligand bias underlies differential signaling of multiple FGFs via FGFR1
Source: eLife journal article supplement (doi:10.7554/elife.88144), 2023-06-06

D

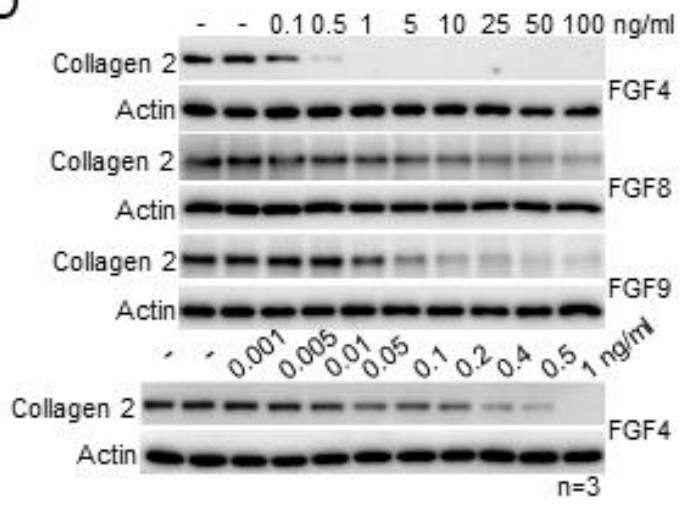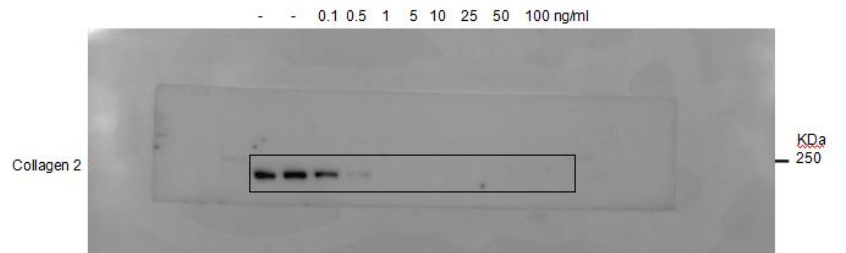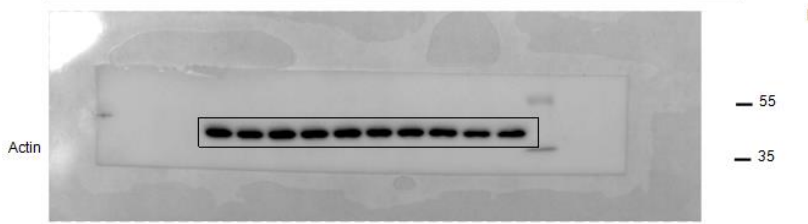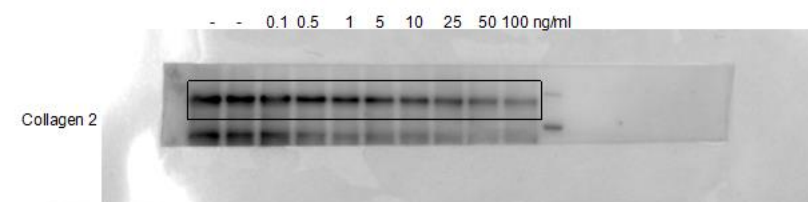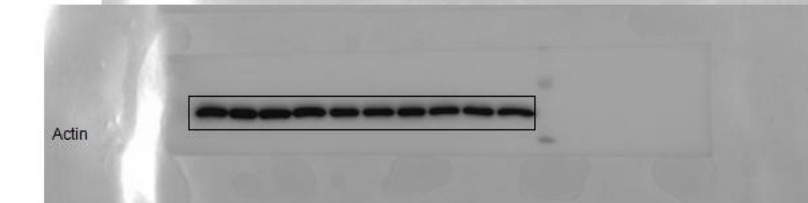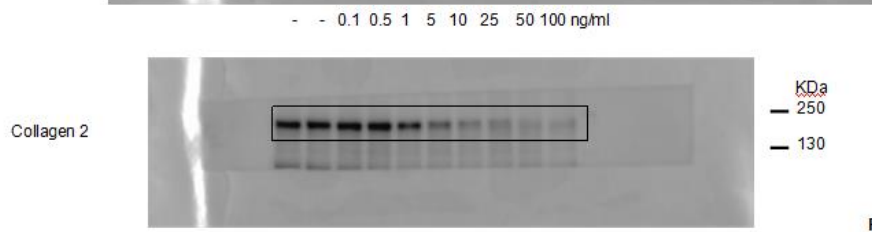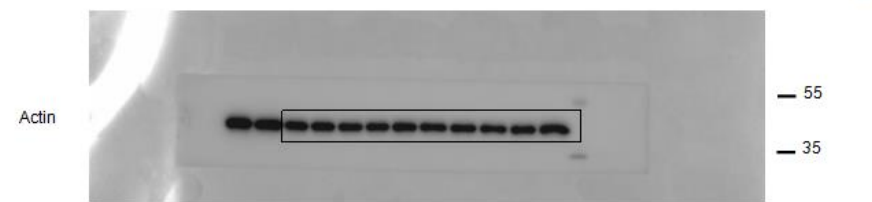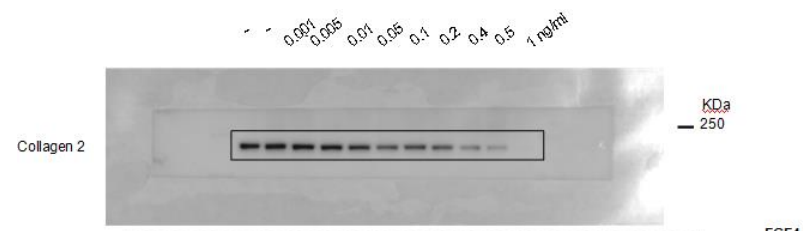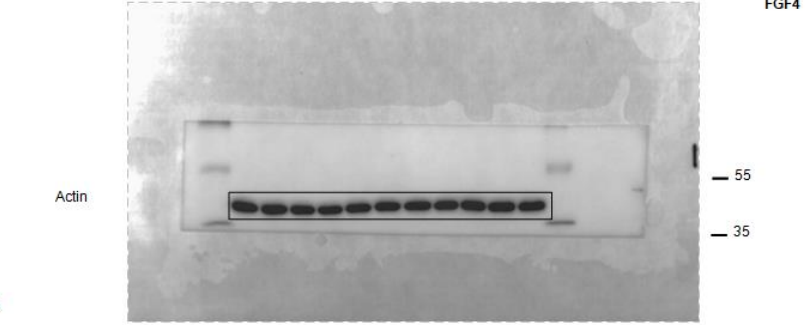

Supplement: fig5-data3 [file elife-88144-fig5-data3-v1.pdf]
