# Supplementary material for: Ligand bias underlies differential signaling of multiple FGFs via FGFR1
Source: eLife. 2024 Apr 3;12:RP88144. doi: 10.7554/eLife.88144 (PMC10990489; doi:10.7554/eLife.88144)
Supplement: Figure 1—source data 5. [file elife-88144-fig1-data5.xlsx]

## Sheet: Sheet1
		Figure 1B
			Mean	SEM
		Control	0.0001
	FGF4	10´	1
		30´	0.4713	0.0468583
		1h	0.390058	0.0438554
	FGF8	10´	0.0785868	0.01603
		30´	0.125698	0.0259143
		1h	0.142987	0.0206196
	FGF9	10´	0.384425	0.0589828
		30´	0.134732	0.0245202
		1h	0.161007	0.027306
