# Supplementary material for: Ligand bias underlies differential signaling of multiple FGFs via FGFR1
Source: eLife. 2024 Apr 3;12:RP88144. doi: 10.7554/eLife.88144 (PMC10990489; doi:10.7554/eLife.88144)
Supplement: Figure 1—source data 6. [file elife-88144-fig1-data6.xlsx]

## Sheet: Sheet1
	FGF4			FGF8			FGF9			CTRL
time (h)	average	SEM		average	SEM		average	SEM		average	SEM
0	0.252941	0.243132		0.47153	0.667787		0.0995497	0.0974263		1.01148	0.452848
1	12.1256	5.20221		0.901205	0.636067		4.57857	1.85283		1.06325	0.454646
2	28.8915	7.64834		2.55891	0.874016		11.7338	3.42354		0.726404	0.339331
3	61.6895	5.57119		6.97248	2.35056		20.0698	2.34149		0.639478	0.302991
4	73.7029	9.07385		8.53491	2.74094		22.8611	3.52444		0.858976	0.455619
5	78.1122	11.2142		8.42404	3.00984		23.9339	3.65597		1.35831	0.559056
6	80.4842	10.7035		7.95085	2.8348		25.8058	3.53142		1.65231	0.644345
7	83.3218	10.1433		7.15933	2.41511		28.6451	3.57593		1.50164	0.48443
8	86.4466	10.2612		8.61204	2.69102		34.4033	3.65404		1.08098	0.377441
9	88.767	9.70386		10.0943	3.14762		40.1583	3.76606		0.968771	0.36018
10	88.383	7.9673		12.4807	3.31203		44.7831	4.38093		0.922656	0.32997
11	87.3799	5.95369		14.065	3.63476		48.7813	4.94899		0.867089	0.427709
12	84.594	4.97468		15.8674	3.96988		51.2062	5.09406		1.03053	0.373593
13	82.5048	4.5702		17.4612	4.11514		51.3805	5.59881		0.730566	0.367823
14	78.2656	4.62339		18.689	4.18533		50.604	5.61826		0.935128	0.429677
15	74.2501	5.32636		19.014	4.09081		48.1323	5.62679		1.13955	0.438196
16	71.0606	5.46234		18.6927	3.86894		44.2556	5.82553		1.02386	0.451275
17	66.2279	5.20293		18.3531	3.49858		40.5937	5.58364		0.846068	0.302318
18	60.5843	4.91523		17.474	3.22473		37.0996	5.04635		0.758933	0.378011
19	55.1134	4.77122		16.4348	2.97869		32.1304	4.74339		0.937937	0.480866
20	50.3376	4.76262		14.6986	2.51075		28.7644	4.15518		1.32884	0.646676
21	45.633	4.72982		13.1495	2.44776		25.5736	3.87716		1.46804	0.726382
22	41.1584	4.61704		12.2809	2.3554		21.728	3.08227		1.34655	0.672878
23	37.375	4.6611		10.497	2.45506		18.7594	2.7111		1.34058	0.557626
24	32.768	5.34564		10.5009	2.40906		15.9198	3.57611		1.30926	0.745393
25	29.5665	5.75289		9.29132	2.33471		14.0751	1.88998		1.42525	0.636828
26	27.0146	5.58667		8.08667	2.2633		10.8211	1.59739		1.05082	0.472799
27	24.997	5.26587		7.92342	1.76535		8.90395	1.31116		0.872585	0.351584
28	22.4446	4.95766		6.99058	1.49493		7.50057	1.02646		1.0048	0.355407
29	22.0103	4.49289		6.74436	1.84191		6.13355	0.898424		0.886896	0.370443
30	19.5844	4.8066		5.76755	1.39734		5.23726	0.744877		0.725264	0.349602
31	18.2197	4.35691		4.74944	1.31311		4.55261	0.550525		0.722907	0.302994
32	16.8422	4.4366		3.87737	1.61763		3.38282	0.471659		0.687412	0.36726
33	16.7725	4.51709		3.56813	1.87559		2.7843	0.396481		1.00625	0.512825
34	16.4545	3.98898		3.04527	1.65907		2.38712	0.334657		1.1934	0.45271
35	15.6117	3.75397		2.4406	1.28842		2.23631	0.354321		0.989034	0.44267
36	16.0432	3.72272		2.40122	1.18831		2.21861	0.285936		0.767424	0.375331
37	16.689	3.75428		2.13936	1.13735		1.93433	0.287274		0.878684	0.36401
38	17.6101	3.76754		1.96127	0.981095		1.93307	0.308381		0.926466	0.332578
39	17.3012	3.46307		1.90121	0.960269		1.90323	0.313663		0.825495	0.28258
40	18.0342	2.92851		1.85738	1.00134		2.16079	0.391544		0.77172	0.314733
41	18.7335	2.69789		2.08946	1.1788		2.31842	0.444271		1.07034	0.385082
42	20.3611	2.8391		1.89487	1.05411		2.61232	0.556699		0.965436	0.480169
43	21.1309	2.92025		2.01765	1.1075		2.94583	0.565784		1.18653	0.731958
44	21.961	2.95211		2.02666	1.2483		3.25989	0.624717		1.1164	0.704661
45	22.5311	2.65463		2.06386	1.13016		3.62803	0.617141		0.762156	0.439015
46	22.4197	2.92667		1.84829	1.031		3.73651	0.679564		0.866364	0.44382
47	22.5631	2.39934		1.97295	1.05966		4.17655	0.65432		1.23274	0.759579
Figure 1C
1st repetition raw data																								2nd repetition raw data																							3rd repetition raw data
time (h)	FGF4					FGF8					FGF9					CTRL								FGF4					FGF8					FGF9					CTRL								FGF4
0	0	0	0.216613	0		0	0	0.462485	0.917522		0	0	0	0.566234		0.361654	1.91505							0	0	0	2.30618		0	0	0.525467	0		0	0	0	0.683775		0	2.68661							0	0	0
1	0	0	0	0		0	0	1.0229	0.948694		0	0	0	0.324304		0.732517	1.83281							1.24168	0	0	2.86494		0	0.478366	0.604408	0		0	0	0	0.700706		0	3.66755							19.6528	15.9245	16.8867
2	9.09992	8.13485	7.75237	12.2269		0.400387	0.736875	2.08975	3.4119		1.37082	3.01058	3.73456	6.07986		0.689444	1.15629							15.2669	8.13346	10.4596	19.7875		0.946296	3.9393	7.07713	3.36137		1.32389	0.926383	2.7789	2.18876		0	2.39744							35.5418	32.1034	38.4649
3	60.8294	63.9088	71.1232	69.1132		11.2019	8.48246	11.6561	18.4327		12.0029	24.8014	30.7383	32.3599		0.333343	1.20154							75.4941	61.5377	69.0291	86.9545		10.382	6.67934	17.5514	16.6492		14.6561	12.7842	26.791	15.2845		0	1.71384							51.9702	46.9182	45.6307
4	79.9808	81.8529	95.5452	90.1603		14.0466	10.4281	16.3588	19.1046		18.6272	31.5217	38.1996	42.171		0.610064	1.49933							106.124	83.8736	87.4732	116.039		15.8892	10.3708	17.5419	20.9751		27.4424	15.7053	40.7136	23.6419		0	1.63366							57.8465	45.5194	45.9449
5	91.5954	94.8705	113.647	102.854		14.9211	9.80516	16.043	14.9047		22.4224	33.3144	33.959	40.347		2.18053	2.41661							117.778	91.9038	95.66	123.739		17.3507	9.3104	22.0277	18.4601		29.9486	22.0178	46.2872	28.8207		0	3.50719							58.5951	46.8881	43.7533
6	95.6335	97.3651	117.735	103.767		13.381	8.00783	15.3415	11.6648		24.2796	36.1976	33.3273	39.6994		3.5101	3.30158							114.07	96.7887	96.2021	120.04		17.6074	9.39562	16.9902	17.1035		28.6109	17.9054	48.6309	29.7202		0	3.80023							69.4506	49.0464	49.0064
7	95.8765	98.9411	118.751	106.746		12.2238	5.93489	15.5662	11.2397		27.2409	39.0636	38.7786	43.3691		3.19078	2.04785							116.114	96.6027	94.78	116.264		15.0351	8.84787	13.7109	14.6049		26.5187	18.3227	49.1371	33.8809		0	2.09207							83.784	54.12	50.6183
8	97.3722	103.465	122.17	112.607		16.3499	10.3507	19.2026	15.2971		31.2703	47.199	50.2547	47.6707		1.60373	2.31801							113.782	100	99.0738	120.927		13.9983	11.0686	20.222	17.092		28.6755	24.1166	51.6047	39.564		0.603095	0.954424							93.2161	54.8997	49.5811
9	100	105.987	124.898	112.949		20.9373	12.7968	21.9488	21.339		38.4571	56.8171	58.3754	51.7142		1.10397	1.85903							116.551	97.3764	103.489	119.253		13.9112	11.0045	24.6208	15.2652		32.8663	30.3298	56.863	42.8809		1.20331	1.39726							96.6256	61.7507	51.4344
10	97.9843	103.262	122.325	114.046		24.8012	16.7017	24.7276	26.7447		45.3175	63.2012	66.0054	58.0463		0.546015	2.77523							111.126	86.9309	98.7208	107.73		16.1442	10.8193	26.9444	18.6751		34.6193	36.2438	65.0327	38.1666		1.15309	1.00873							98.9993	68.9337	55.6547
11	94.2877	96.3378	118.523	109.385		30.6276	20.3403	27.4394	28.3902		49.9862	67.6545	73.1305	62.8794		0.242442	3.80446							104.966	79.91	93.3817	96.6842		21.7664	9.01959	27.4825	23.1757		34.5918	43.9377	69.2105	36.1058		0.776701	0.956767							97.2473	76.4116	62.6667
12	91.427	93.7195	113.021	102.264		34.6798	23.4481	31.8196	30.0835		53.9171	72.8513	74.7796	66.4902		1.62061	3.40654							95.8528	68.5157	83.9216	83.4275		23.2093	13.1496	31.7724	22.4604		37.4302	43.291	75.4286	38.8891		0.841302	0.956802							99.8604	81.4571	66.6423
13	87.6926	87.32	109.878	98.3975		34.4197	27.9693	33.3858	31.0838		57.3159	76.5448	74.1929	66.2344		2.85224	1.34565							84.7876	63.9641	76.4291	77.4578		23.4357	18.3416	31.8999	29.4546		37.3284	39.986	77.7279	30.687		0.633017	1.38892							100	81.6891	70.4871
14	82.1097	82.7881	102.782	92.8081		36.5057	27.5976	34.4518	37.0553		55.9367	79.4592	72.6259	62.8841		2.7466	1.4772							77.312	55.3444	69.5791	69.2792		19.7604	23.513	31.0947	28.3332		30.7972	34.7348	68.8298	26.263		0	2.63028							96.7431	82.7077	68.4482
15	79.6447	81.2545	97.085	88.6211		37.5503	26.8021	36.1646	37.5359		55.0565	80.9871	72.3668	54.768		2.62288	2.55003							72.8726	46.0293	59.6976	56.5204		20.9743	24.9641	28.8971	23.0116		29.0709	32.1542	64.6033	22.1938		0	2.08004							96.0591	79.7428	68.4498
16	76.4892	80.5891	93.2043	83.0782		39.3759	25.9755	37.2932	36.3215		49.0073	81.4127	66.3107	49.4327		1.67058	3.73363							68.0376	41.2283	56.6861	47.0475		18.9701	20.985	22.3597	18.3526		24.0767	22.094	58.999	22.3871		0	1.50619							92.8124	75.9416	66.5074
17	72.4427	79.8526	88.3472	77.7694		34.6976	27.4311	35.4805	33.4567		45.0879	78.7962	60.1964	42.8626		1.19894	1.95492							63.1674	38.4923	51.853	43.2883		16.8119	19.6324	21.555	21.3575		17.8872	21.2774	48.8169	27.4358		0.434068	1.58286							83.7023	72.2166	62.4733
18	67.6027	74.4864	81.4798	76.7635		30.2111	27.7535	32.4337	28.9416		41.8767	72.3966	51.5566	36.8855		0	2.50256							55.0853	34.2618	47.607	42.5839		15.1894	17.5673	20.9836	24.4275		16.3465	22.4811	41.9319	26.4807		0	1.7066							70.1688	58.6234	61.2701
19	61.4816	71.9606	74.6342	74.5836		24.1043	27.8193	29.3285	23.8993		34.0883	63.5716	48.6235	27.8665		0.616697	3.35329							48.6198	33.9219	47.5931	37.1982		15.0664	23.5074	17.3883	26.5391		13.4016	21.4488	44.783	19.5906		0	1.75061							60.0588	54.1395	54.687
20	54.5574	67.1124	67.988	71.6012		20.3031	24.0215	21.9223	20.6431		31.0613	55.5251	42.7581	26.4007		2.7209	4.56984							46.1762	31.3653	47.0952	33.8153		9.63809	24.9888	16.9552	21.0513		10.3352	19.827	44.5864	21.1157		0	1.7286							52.2513	49.4366	48.7663
21	47.6986	64.3066	60.6561	65.4952		20.0058	20.8497	19.7471	18.6347		29.0424	50.1448	40.6752	23.7437		4.37204	4.80337							42.5037	28.808	41.9475	29.6537		8.88084	27.197	11.7402	14.0313		8.49309	20.6705	41.1841	21.1158		0	2.25645							43.6369	40.6119	44.7878
22	43.324	60.1802	56.3847	59.3859		14.5354	17.8118	18.5887	16.6554		22.3782	41.7899	33.1587	19.7548		5.1161	3.42092							35.3095	26.9084	36.2071	28.0691		9.1172	26.6997	9.66081	14.5294		6.51631	16.5129	32.9962	20.8815		0	2.10975							36.5741	34.0746	41.138
23	41.2456	55.943	53.2473	53.857		10.5489	15.0849	16.8863	14.974		20.3059	35.2828	30.5016	17.0143		4.39817	2.87057							32.7715	27.1664	36.2279	28.0878		6.89255	28.2187	7.77585	10.7909		5.79927	12.7374	27.5884	20.4729		0	1.65573							29.1528	28.5232	36.0131
24	39.9057	54.9262	49.2853	48.1724		5.8143	12.3624	13.3027	13.3196		15.1907	29.1363	30.9011	13.384		4.96359	1.1697							33.6388	21.5732	32.619	27.6019		3.35211	24.417	5.42981	7.44883		3.83399	13.0712	24.5589	18.1406		0	1.61044							27.0947	27.8162	30.3704
25	39.5732	50.4465	47.0873	42.3439		4.75535	12.1236	11.1966	12.249		13.8754	23.7577	30.7289	12.1389		4.33442	1.5891							35.026	16.6374	30.4716	25.7687		3.49835	23.5917	4.86714	3.50183		1.89685	10.9062	24.8806	21.4155		0	1.55152							24.4026	25.6518	21.4322
26	37.6982	45.753	46.0362	36.8669		3.05011	10.8429	10.6054	12.2567		10.3554	18.0244	23.6882	11.2419		2.69623	1.32193							32.9501	14.7482	28.1975	23.8615		1.50523	19.7484	4.10489	1.03422		0	8.11486	22.9602	16.0828		0	2.03872							23.4041	17.8509	20.3665
27	36.4088	41.5538	44.307	34.4074		3.14708	8.87576	10.5075	11.8936		7.03086	13.2896	16.9619	7.78991		1.65802	1.30726							30.6528	13.8691	28.4101	21.3979		3.96088	15.5775	6.86274	1.26032		0.520782	5.77823	22.3802	13.5858		0	1.58677							20.414	16.8975	17.4532
28	34.0754	37.202	40.8102	30.4844		3.09438	5.21554	9.45899	10.3069		7.97236	9.72292	8.84326	7.62292		1.38742	1.67128							28.7844	14.7217	28.0463	18.462		3.12498	13.2133	7.55741	2.73638		0	6.23728	19.6811	11.7818		0	2.27097							18.9317	15.9623	14.7844
29	32.4052	36.0191	39.107	27.9257		2.25561	4.3963	9.30635	8.03961		7.4339	7.10876	4.00961	9.61226		0.762988	1.74069							26.9064	14.661	29.4649	21.1994		4.35491	16.9732	6.34735	1.2797		0.915309	6.81251	17.7229	6.69194		0	1.64455							18.069	12.6853	15.9236
30	34.1448	32.6343	36.5415	26.0901		1.84043	4.26143	5.51144	7.31302		6.14262	5.34925	2.82039	8.39635		0.208768	1.37463							26.0575	13.4688	27.4004	19.5212		3.66024	14.0081	5.23348	2.42658		1.06811	4.84613	14.672	5.79427		0	1.68459							13.1275	10.5519	11.0532
31	33.9925	26.6202	33.5635	25.6226		0.797325	2.7039	6.47986	6.66883		4.25233	4.20096	4.19016	6.08761		0.734488	1.54117							23.0372	15.1779	23.1126	18.6935		1.30913	10.5533	4.86221	1.41746		1.83065	3.8347	11.9076	5.61332		0	1.68438							11.7308	8.93027	9.93818
32	33.701	21.7254	33.7327	26.4459		0	2.19975	4.6943	2.49263		1.96392	2.62394	2.86282	4.76445		0.462693	1.32574							17.2982	14.529	20.5984	18.1223		0	14.4598	3.82419	1.28659		1.31211	3.66919	9.21495	3.0334		0	2.04895							13.4118	9.15357	9.09538
33	33.531	23.3813	31.8055	27.1276		0	1.24609	4.21377	2.50277		2.08901	0.686602	3.45302	4.12189		0.49974	2.84218							17.4528	15.3406	22.3856	19.2122		0.696305	17.1032	3.16416	1.28403		0	3.56778	7.51964	2.22287		0	2.53427							11.8743	7.86991	9.42731
34	32.5272	20.96	29.8247	25.5625		0	0.753418	4.33467	1.78612		1.96492	0.787888	4.23088	3.00048		1.89591	2.59583							18.0462	14.7268	19.9876	19.9648		0.878465	14.5895	2.9748	1.16111		0	2.97064	5.39829	0.907535		0	2.23771							10.9627	10.2311	8.76338
35	29.5784	20.4734	27.013	26.3926		0	1.13503	2.92112	1.57699		1.0279	0.821599	4.61937	1.59651		2.16854	2.02126							17.3157	15.9339	17.8908	16.6155		0.734639	11.4883	2.63575	0.564405		0	3.09225	4.58506	0		0	1.3475							10.8583	8.77206	10.2672
36	31.3406	20.6915	25.377	26.8642		0	0.793857	1.51684	2.39004		1.74748	0.933288	3.07757	2.58255		2.06384	1.37502							14.851	15.9337	16.9809	18.1871		0.431406	10.8064	2.15547	2.10915		0	2.40422	3.04281	0.912895		0	1.41057							13.2513	11.5357	9.35181
37	32.5189	20.9883	26.9612	26.2541		0	0.341757	1.49135	2.14083		1.48919	0.969975	3.20671	1.84249		2.17129	1.02608							13.7265	17.8356	17.8627	18.413		1.15142	9.73407	1.7416	2.71703		0	2.97959	2.56089	0		0	1.318							14.944	14.4144	8.3163
38	33.562	24.0262	26.9947	24.9622		0	0.52536	1.41311	2.419		1.53441	1.05504	2.17873	2.1873		1.84613	0.984414							15.0758	17.8059	17.9307	19.7673		0.381961	8.66819	1.00319	1.69794		0.478863	2.92457	1.24495	0		0.686331	1.27175							18.3467	17.0477	9.13897
39	30.4962	22.2468	27.2036	22.994		0	0.839488	1.22957	2.15759		2.00279	1.29718	2.22878	1.18295		1.59298	0.673602							15.1258	18.0566	19.0486	19.6779		0	8.26149	0	1.14099		0.395698	1.71512	2.43623	0		1.01647	1.23437							17.1664	18.0288	10.2251
40	28.4315	21.722	27.0134	23.6722		0	0.697801	0.61429	1.76503		2.35728	2.42826	2.50338	0.517268		0.900846	1.97482							13.9701	19.2379	22.2057	17.7487		3.1582	8.55294	0	1.69914		1.05747	1.81248	4.19153	0		0.71572	1.27115							19.0654	16.2995	10.1819
41	27.9876	22.5999	25.0986	23.2246		0	0.358148	0.385511	1.21579		2.38269	2.04343	3.38632	0.855178		1.83139	2.27369							16.3924	22.1375	21.6314	20.328		3.91449	10.0565	0	3.91524		1.40471	1.57427	5.86955	0		0.616867	1.85461							19.6109	15.9293	13.9211
42	30.2891	24.1393	27.1492	25.8715		0.428337	0.628085	0.205907	1.16137		2.41223	2.55441	3.19913	2.76811		1.86284	2.92165							15.9101	21.9449	22.7889	21.6684		1.12274	9.45224	0.425159	1.71994		1.40287	0.710325	7.72456	0		0	1.25443							23.6158	17.776	13.611
43	30.2669	25.1196	28.1587	25.3698		0.768976	0.64243	0	0.58903		2.41342	3.33565	4.23001	3.58756		2.57584	4.38324							13.7314	21.1894	24.9828	23.885		0	8.86213	0.48156	0		1.26263	0.714443	9.83562	0		0	1.18699							26.605	18.4539	15.2715
44	30.4532	26.4642	29.5106	26.6732		0	0.351572	0	0.970638		2.77699	4.15429	4.50541	3.46016		2.66174	4.03218							13.1845	20.3388	24.3339	24.3323		0	10.4229	1.19433	0.368899		1.22784	0.73503	10.8016	0		0	1.2031							28.2035	19.7248	16.7325
45	28.9765	25.4889	30.8942	27.1138		0	0.715538	0	1.24982		2.68183	5.35446	5.67981	5.13357		1.99545	2.26334							14.3154	21.0933	23.2981	23.623		0	9.63969	1.35239	3.72009		0.845455	0.762787	10.1956	0.704469		0	0.819117							27.0358	19.0682	18.436
46	29.2682	25.5402	29.8548	26.3255		0	0.433909	0	0.77142		2.50381	7.47705	3.99545	6.43293		1.63765	2.63821							14.9922	18.942	25.1766	24.153		0.543676	8.5731	0.769921	2.601		0	1.06882	9.10325	1.05793		0	1.20363							31.813	20.8839	16.8014
47	27.1978	26.1802	28.0744	25.0158		0.429133	0.384033	0	1.13504		2.67914	7.55256	4.78385	7.45422		1.83855	5.00763							17.1238	19.6014	23.5854	23.6216		0.37401	8.86678	2.72591	3.0411		0	0.982749	7.46409	1.42122		0.490505	0.776133							30.1058	22.458	16.3395
[truncated: 25 more columns]
