# Supplementary material for: Ligand bias underlies differential signaling of multiple FGFs via FGFR1
Source: eLife. 2024 Apr 3;12:RP88144. doi: 10.7554/eLife.88144 (PMC10990489; doi:10.7554/eLife.88144)
Supplement: Figure 2—source data 1. [file elife-88144-fig2-data1.xlsx]

## Sheet: Sheet1
brightness	FGF4 High	stder	FGF4 Low	stder	FGF8	stder	FGF9	stder	no lig	stder	epha2+fc	stder	LAT	stder	ECAD	stder	TrkA+NT3	stder
0.10833	0.04481	0.00457	0.11096	0.02391	0.03179	0.00557	0.06576	0.0044	0.14421	0.00406	0.09512	0.02307	0.23948	0.03162	0.04173	0.00678	0.0663	0.00389
1.075	0.51949	0.02557	0.70183	0.02468	0.53095	0.02684	0.69445	0.01523	0.88222	0.00893	0.6774	0.03804	1	0	0.59396	0.0114	0.76573	0.04219
1.55833	0.83888	0.0395	1	0.00182	0.91505	0.01339	1	0.00748	1	0	0.92427	0.00804	0.89572	0.04423	0.89643	0.03049	1	0.02411
2.04167	0.91363	0.03303	0.95672	0.02213	1	0	0.99084	0.01526	0.76223	0.00706	0.99247	0.01258	0.63656	0.06718	1	0.00186	0.98877	0.0182
2.525	1	0	0.66901	0.02781	0.92079	0.02333	0.89995	0.03723	0.48751	0.0034	0.99944	0.00466	0.38695	0.05896	0.9252	0.02938	0.88054	0.06629
3.00833	0.85915	0.05554	0.45527	0.03849	0.67395	0.01421	0.66503	0.00464	0.34637	0.0074	1	0.0086	0.27222	0.02944	0.74285	0.05272	0.70464	0.02607
3.49167	0.75794	0.01304	0.25005	0.03005	0.5225	0.02287	0.50566	0.04327	0.24536	0.01155	0.86662	0.02415	0.17662	0.02262	0.58092	0.08026	0.61384	0.03367
3.975	0.61795	0.02771	0.15852	0.01871	0.43118	0.0137	0.35917	0.0088	0.1975	0.00666	0.78788	0.04014	0.13261	0.02063	0.46522	0.09924	0.40573	0.02489
4.45833	0.49192	0.02422	0.11585	0.01609	0.32409	0.00588	0.24843	0.01057	0.13368	0.01095	0.66234	0.0153	0.09375	0.01134	0.36049	0.10019	0.31071	0.00762
4.94167	0.29218	0.01153	0.06662	0.01027	0.21207	0.01708	0.16627	0.000377588	0.10567	0.00732	0.66479	0.03148	0.07697	0.00636	0.28533	0.10138	0.22448	0.02137
5.425	0.29198	0.00832	0.05595	0.00949	0.14247	0.01702	0.13048	0.01616	0.0716	0.00559	0.57937	0.0189	0.0598	0.00668	0.24527	0.10059	0.17674	0.00461
5.90833	0.2295	0.00837	0.03684	0.00803	0.09106	0.00752	0.10013	0.01186	0.05359	0.00332	0.51426	0.00382	0.04745	0.00462	0.19863	0.09732	0.1172	0.00311
6.39167	0.17115	0.01816	0.02767	0.00397	0.06865	0.00721	0.09638	0.0102	0.04563	0.0046	0.46328	0.03488	0.04324	0.0056	0.18218	0.09862	0.08587	0.01118
6.875	0.14057	0.00819	0.02211	0.00377	0.05292	0.00187	0.05633	0.01265	0.03044	0.00354	0.38227	0.01179	0.04233	0.00708	0.1466	0.08237	0.05978	0.00755
7.35833	0.14618	0.01429	0.01677	0.00224	0.05022	0.00499	0.06107	0.00981	0.03037	0.00325	0.34735	0.00531	0.03269	0.00433	0.13257	0.07543	0.07032	0.00385
8.325	0.08046	0.00439	0.0095	0.00106	0.04048	0.00234	0.0377	0.00385	0.02227	0.00393	0.27832	0.01725	0.02364	0.0049	0.10539	0.07424	0.0434	0.00493
8.80833	0.06541	0.00721	0.00756	0.00104	0.03087	0.00521	0.03856	0.00223	0.01424	0.00207	0.27149	0.00023574	0.02295	0.0022	0.08577	0.05981	0.02453	0.00127
9.29167	0.07735	0.00642	0.00809	0.00128	0.01848	0.003	0.02662	0.00342	0.01468	0.0026	0.22829	0.01719	0.01829	0.00365	0.08482	0.05629	0.02053	0.0031
9.775	0.06558	0.00833	0.00623	0.00163	0.01757	0.00362	0.02874	0.00313	0.01366	0.00293	0.21694	0.01939	0.01651	0.000759061	0.08007	0.05673	0.03944	0.0031
10.2583	0.05166	0.00816	0.003	0.000774537	0.01368	0.00443	0.0132	0.00313	0.01242	0.00167	0.18381	0.00288	0.01423	0.0022	0.07215	0.05104	0.01703	0.00297
