# Supplementary material for: Ligand bias underlies differential signaling of multiple FGFs via FGFR1
Source: eLife. 2024 Apr 3;12:RP88144. doi: 10.7554/eLife.88144 (PMC10990489; doi:10.7554/eLife.88144)
Supplement: Figure 3—source data 4. [file elife-88144-fig3-data4.xlsx]

## Sheet: Sheet1
				fgf4					fgf8					fgf9
					M	signal	error			M	signal	error			M	signal	error
	Y766 phosphorylation				5.26316e-12	0	0.011917			5.26316e-12	0	0.058583			5.26316e-12	0	0.00245711
					2.63158e-11	0.0841774	0.0275009			2.63158e-10	0.113598	0.0650194			2.63158e-10	0.0463524	0.0107855
					7.89474e-11	0.121943	0.0040096			1.31579e-09	0.0534228	0.0528816			1.31579e-09	0.176754	0.0353358
					1.31579e-10	0.220717	0.075001			2.63158e-09	0.11877	0.0490663			2.63158e-09	0.324026	0.102683
					2.63158e-10	0.182464	0.0946931			6.57895e-09	0.34654	0.0931895			6.57895e-09	0.527651	0
					5.26316e-10	0.310602	0.0625128			1.05263e-08	0.519221	0.109175			2.63158e-08	0.474274	0.184939
					7.89474e-10	0.432514	0.0513489			1.57895e-08	0.630075	0.0987541			5.26316e-08	0.529799	0.114493
					1.31579e-09	0.545309	0.0683773			2.10526e-08	0.632001	0.101316			1.31579e-07	0.399298	0.00810149
					2.63158e-09	0.652359	0			2.63158e-08	0.830165	0.0406765			2.63158e-07	0.349198	0.0853703
					6.57895e-09	0.679577	0.064817			5.26316e-08	0.952565	0.0504554			5.26316e-07	0.461136	0.0156489
					2.63158e-08	0.594788	0.0598781			1.31579e-07	1	0.071439
					5.26316e-08	0.541732	0.0905075			2.63158e-07	0.861998	0.0370022
					1.31579e-07	0.530141	0.0575876
					2.63158e-07	0.393435	0.158509
