# Supplementary material for: Ligand bias underlies differential signaling of multiple FGFs via FGFR1
Source: eLife. 2024 Apr 3;12:RP88144. doi: 10.7554/eLife.88144 (PMC10990489; doi:10.7554/eLife.88144)
Supplement: Figure 3—source data 5. [file elife-88144-fig3-data5.xlsx]

## Sheet: Sheet1
					fgf4					fgf8					fgf9
						M	signal	error			M	signal	error			M	signal	error
	PLCgamma phosphorylation					5.26316e-12	0	0.0111716			5.26316e-12	0	0.0600222			5.26316e-12	0	0
						2.63158e-11	0.34237	0.0215327			2.63158e-10	0.28202	0.109294			2.63158e-10	0.346456	0.065869
						7.89474e-11	0.373269	0.0354714			1.31579e-09	0.563	0.154579			1.31579e-09	0.549855	0.104651
						1.31579e-10	0.452218	0.0417748			2.63158e-09	0.645678	0.0646701			2.63158e-09	0.564843	0.0371606
						2.63158e-10	0.545861	0.144546			6.57895e-09	0.757918	0.0703683			6.57895e-09	0.553569	0.0889199
						5.26316e-10	0.666414	0.0410212			1.05263e-08	0.950064	0.0719005			2.63158e-08	0.630263	0.0297068
						7.89474e-10	0.778796	0.0392064			1.57895e-08	0.948788	0.0477697			5.26316e-08	0.637381	0
						1.31579e-09	0.832554	0.0997317			2.10526e-08	0.887935	0.050565			1.31579e-07	0.380136	0.00424798
						2.63158e-09	0.790248	0			2.63158e-08	1	0.0260953			2.63158e-07	0.431798	0.156434
						6.57895e-09	0.762289	0.0807565			5.26316e-08	0.990688	0.0562094			5.26316e-07	0.308617	0.104906
						2.63158e-08	0.651442	0.0647152			1.31579e-07	0.887787	0.0856906
						5.26316e-08	0.591729	0.131837			2.63158e-07	0.800538	0.0641691
						1.31579e-07	0.465329	0.0228918
						2.63158e-07	0.423979	0.0450146
