# Supplementary material for: Ligand bias underlies differential signaling of multiple FGFs via FGFR1
Source: eLife. 2024 Apr 3;12:RP88144. doi: 10.7554/eLife.88144 (PMC10990489; doi:10.7554/eLife.88144)
Supplement: Figure 3—source data 6. [file elife-88144-fig3-data6.xlsx]

## Sheet: Sheet1
					M	signal	error				M	signal	error				M	signal	error
	FRS2 phosphorylation				5.26316e-12	0	0				5.26316e-12	0	0.00775939				5.26316e-12	0	0
					2.63158e-11	0.0210395	0.0159091				2.63158e-10	0.151527	0.0363765				2.63158e-10	0.0757361	0.0130893
					7.89474e-11	0.155577	0.0208203				1.31579e-09	0.455775	0.0414764				1.31579e-09	0.235958	0.0427538
					1.31579e-10	0.235855	0.0281667				2.63158e-09	0.563105	0.0525307				2.63158e-09	0.307812	0.0444605
					2.63158e-10	0.439111	0.108714				6.57895e-09	0.725225	0.0467293				6.57895e-09	0.432018	0.0466651
					5.26316e-10	0.533259	0.016547				1.05263e-08	0.903069	0.122299				2.63158e-08	0.476279	0.0339404
					7.89474e-10	0.70877	0.0491754				1.57895e-08	0.965586	0.0574784				5.26316e-08	0.515506	0.0160234
					1.31579e-09	0.809332	0.099265				2.10526e-08	0.879006	0.0639379				1.31579e-07	0.428652	0.0634872
					2.63158e-09	0.770831	0				2.63158e-08	0.996816	0.0350494				2.63158e-07	0.407446	0
					6.57895e-09	0.590514	0.0115488				5.26316e-08	1	0.050549				5.26316e-07	0.340532	0.0153787
					2.63158e-08	0.394021	0.130304				1.31579e-07	0.898848	0.12045
					5.26316e-08	0.34098	0.153478				2.63158e-07	0.913838	0.0459609
					1.31579e-07	0.27421	0.199383
					2.63158e-07	0.291462	0.149072
