# Supplementary material for: Ligand bias underlies differential signaling of multiple FGFs via FGFR1
Source: eLife. 2024 Apr 3;12:RP88144. doi: 10.7554/eLife.88144 (PMC10990489; doi:10.7554/eLife.88144)
Supplement: Figure 3—source data 7. [file elife-88144-fig3-data7.xlsx]

## Sheet: Sheet1
			fgf4						fgf8						fgf9
				M	signal	error				M	signal	error				M	signal	error
	Total FGFR1			5.26316e-12	0.118889	0.0528399				5.26316e-12	0.123674	0.0721303				5.26316e-12	0	0.0532263
				2.63158e-11	0.0251179	0.0640547				2.63158e-10	0	0.0258163				2.63158e-10	0.0402881	0.0481691
				7.89474e-11	0	0.0353568				1.31579e-09	0.0426813	0.0478602				1.31579e-09	0.00195013	0.0627695
				1.31579e-10	0.0809067	0.0510976				2.63158e-09	0.0817048	0.0243572				2.63158e-09	0.139031	0.0775227
				2.63158e-10	0.0421244	0.0416199				6.57895e-09	0.107851	0.0591176				6.57895e-09	0.244227	0.0454038
				5.26316e-10	0.0388012	0.0698408				1.05263e-08	0.298525	0.0981065				2.63158e-08	0.307087	0.0480446
				7.89474e-10	0.138528	0.0385945				1.57895e-08	0.409616	0.0360761				5.26316e-08	0.322974	0.0674052
				1.31579e-09	0.17716	0.057012				2.10526e-08	0.403653	0.0161526				1.31579e-07	0.425908	0.0657748
				2.63158e-09	0.33614	0.0527483				2.63158e-08	0.411036	0.0441296				2.63158e-07	0.415249	0.0567766
				6.57895e-09	0.260305	0.116451				5.26316e-08	0.468562	0.0520885				5.26316e-07	0.412919	0.0899864
				2.63158e-08	0.216322	0.0948321				1.31579e-07	0.560165	0.057459
				5.26316e-08	0.199879	0.0951614				2.63158e-07	0.604987	0.0449839
				1.31579e-07	0.221143	0.029505
				2.63158e-07	0.355385	0.0117381
