# Supplementary material for: Ligand bias underlies differential signaling of multiple FGFs via FGFR1
Source: eLife. 2024 Apr 3;12:RP88144. doi: 10.7554/eLife.88144 (PMC10990489; doi:10.7554/eLife.88144)
Supplement: Figure 4—source data 1. [file elife-88144-fig4-data1.xlsx]

## Sheet: Sheet1
	Time, mins	fgf4high		fgf4low		fgf8high		fgf8low		fgf9high		fgf9low
Y653/4		Mean	Std error	Mean	Std error	Mean	Std error	Mean	Std error	Mean	Std error	Mean	Std error
	0	0		0		0		0		0		0
	1	1	0.07122	0.24827	0.04017	0.95776	0.01023	0.14976	0.1004	1	0.07015	0.59877	0.10013
	5	0.46849	0.04076	0.44819	0.0369	0.95142	0.04587	0.38326	0.06517	0.84745	0.04354	0.8771	0.10405
	10	0.60348	0.01585	0.48057	0.12339	0.90951	0.04318	0.60959	0.16808	0.62642	0.09822	0.97207	0.04323
	20	0.67803	0.08229	0.89018	0.07316	1	0.06261	0.75296	0.09425	0.58151	0.02039	0.95562	0.06043
	60	0.41157	0.07553	1	0.09738	0.73491	0.11096	1	0.09761	0.51612	0.10088	1	0.06731
	Time. Mins	fgf4high		fgf4low		fgf8high		fgf8low		fgf9high		fgf9low
FRS2		Mean	Std error	Mean	Std error	Mean	Std error	Mean	Std error	Mean	Std error	Mean	Std error
	0	0		0		0		0		0		0
	1	1	0.11879	1	0.41279	1	0.1279	0.34522	0.07814	1	0.06856	0.57291	0.09806
	5	0.43306	0.12498	0.78971	0.15442	0.47744	0.11597	1	0.06503	0.60664	0.09369	1	0.04984
	10	0.08175	0.0232	0.36159	0.07459	0.43743	0.08916	0.81454	0.07748	0.58152	0.19633	0.7539	0.30275
	20	0.19534	0.06879	0.39637	0.01026	0.31968	0.02752	0.73161	0.01136	0.68541	0.10332	0.96571	0.11352
	60	0.44825	0.1695	0.59195	0.10786	0.43381	0.07844	0.68814	0.09817	0.38024	0.04605	0.58284	0.21918
