# Supplementary material for: Ligand bias underlies differential signaling of multiple FGFs via FGFR1
Source: eLife. 2024 Apr 3;12:RP88144. doi: 10.7554/eLife.88144 (PMC10990489; doi:10.7554/eLife.88144)
Supplement: Figure 5—source data 1. [file elife-88144-fig5-data1.xlsx]

## Sheet: Sheet1
Cell Viability						Apoptosis						Endocytosis
	FGF8					FGF8
												No Ligand	SE	FGF8	SE	FGF9	SE
Conc (M)	0	1.052e-10	2.104e-10	5.26e-10			0	1.052e-10	2.104e-10	5.26e-10		1	0.04439	0.75251	0.03712	0.93676	0.05213
Average	1	1.19523	1.39492	1.63449		Average	1	0.996416	1.0007	0.983502
stder	0	0.0449015	0.122168	0.0974575		Stder	0	0.0488933	0.0416956	0.0983433
	FGF9					FGF9
Average	1	1.19189	1.23812	1.20999		Average	1	0.922902	0.948346	0.841579
stder	0	0.0838721	0.0647975	0.0862655		Stder	0	0.0492254	0.0586745	0.0677485
