# Supplementary material for: Ligand bias underlies differential signaling of multiple FGFs via FGFR1
Source: eLife. 2024 Apr 3;12:RP88144. doi: 10.7554/eLife.88144 (PMC10990489; doi:10.7554/eLife.88144)
Supplement: Figure 5—source data 4. [file elife-88144-fig5-data4.xlsx]

## Sheet: Sheet1
FGF4	average	standard deviation	SEM		FGF8	average	standard deviation	SEM		FGF9	average	standard deviation	SEM
Control	1	0	0		Control	1	0	0		Control	1	0	0
Control	1	0	0		Control	1	0	0		Control	1	0	0
M					M					M
5.26e-14	1.01173	0.275618	0.218389		5.26e-12	0.907456	0.207286	0.11968		5.26e-12	0.712681	0.0729392	0.0421127
2.63e-13	0.960861	0.398903	0.294901		2.63e-11	0.814236	0.211429	0.122072		2.63e-11	0.752839	0.159208	0.0919217
5.26e-13	0.963675	0.142414	0.106563		5.26e-11	0.585986	0.182794	0.105539		5.26e-11	0.613816	0.0877857	0.0506846
2.63e-12	0.840062	0.0844937	0.0638641		2.63e-10	0.546571	0.152499	0.0880479		2.63e-10	0.395897	0.0691014	0.0398969
5.26e-12	0.769529	0.14747	0.103605		5.26e-10	0.353973	0.120357	0.0694902		5.26e-10	0.210173	0.0581769	0.0335894
1.052e-11	0.702803	0.270702	0.164925		1.315e-09	0.284027	0.122751	0.0708724		1.315e-09	0.170801	0.0728464	0.0420591
2.104e-11	0.218903	0.168837	0.111176		2.63e-09	0.250002	0.0720776	0.0416152		2.63e-09	0.160376	0.0713774	0.041211
2.63e-11	0.0976475	0.129985	0.0204055		5.26e-09	0.232198	0.0797074	0.0460204		5.26e-09	0.118273	0.062841	0.0362823
5.26e-11	0	0
2.63e-10	0	0
5.26e-10	0	0
1.315e-09	0	0
2.63e-09	0	0
5.26e-09	0	0
