# Supplementary material for: Ligand bias underlies differential signaling of multiple FGFs via FGFR1
Source: eLife. 2024 Apr 3;12:RP88144. doi: 10.7554/eLife.88144 (PMC10990489; doi:10.7554/eLife.88144)
Supplement: Figure 5—source data 5. [file elife-88144-fig5-data5.xlsx]

## Sheet: Sheet1
ligand concentration	FGF4				GF8				FGF9
	Mean	SEM	SD		Mean	SEM	SD		Mean	SEM	SD
Negative control	100	0	0		100	0	0		100	0	0
5.26e-14	95.9854	2.69471	4.66738		99.0475	0.45753	5.99183		93.1659	3.45939	5.99183
2.63e-13	95.0646	3.51479	6.0878		98.4246	0.460547	6.05973		92.8162	3.49859	6.05973
5.26e-13	88.6211	4.59217	7.95387		97.9878	0.575915	4.49058		92.9993	2.59264	4.49058
2.63e-12	49.9687	1.08502	1.8793		97.8401	0.573838	2.53848		93.8664	1.46559	2.53848
5.26e-12	30.57	2.87784	4.98456		97.1121	0.697769	3.61407		90.3866	2.08659	3.61407
1.052e-11	21.4768	2.07163	3.58816		96.8684	0.588148	11.7102		84.8836	6.76089	11.7102
2.104e-11	13.3071	0.949058	1.64382		96.7525	0.781504	13.8948		75.7021	8.02216	13.8948
2.63e-11	10.2084	1.7639	3.05516		96.6442	0.750712	4.67825		56.5054	2.70099	4.67825
5.26e-11	7.59478	0.810983	1.40466		95.105	0.443766	1.81435		44.8642	1.04752	1.81435
2.63e-10	1.82608	0.165566	0.286769		92.3616	0.688288	1.19215		20.7054	1.19215	1.19215
5.26e-10	1.47317	0.11673	0.202182		78.0122	1.38677	2.40196		18.4324	2.40196	2.40196
1.315e-09	1.14154	0.145528	0.252062		37.437	1.92654	3.33686		12.8367	0.410153	0.710406
2.63e-09	0.98657	0.0699764	0.121203		22.3646	5.11945	8.86715		8.84747	0.114239	0.197868
3.945e-09	0.928713	0.056972	0.0986785		10.8675	1.79274	3.10512		7.21654	0.553774	0.959165
5.26e-09	0.864131	0.0390758	0.0676812		7.9928	0.33664	0.583077		5.85402	0.24736	0.42844
6.575e-09	0.824651	0.0556074	0.0963149		7.05997	0.418053	0.724088		5.37625	0.421236	0.729602
7.89e-09	0.777864	0.0549819	0.0952314		6.87787	0.579081	1.003		5.00058	0.333233	0.577176
1.052e-08	0.734205	0.0665533	0.115274		4.903	0.423354	0.733271		4.16885	0.424884	0.735921
