# Supplementary material for: Ligand bias underlies differential signaling of multiple FGFs via FGFR1
Source: eLife. 2024 Apr 3;12:RP88144. doi: 10.7554/eLife.88144 (PMC10990489; doi:10.7554/eLife.88144)
Supplement: Figure 6—source data 1. [file elife-88144-fig6-data1.xlsx]

## Sheet: Sheet1
rec/nm2	Etilda
0.00181339	0.602254
0.00396132	0.548072
0.00204836	0.60716
0.00415462	0.657216
0.00227099	0.55192
0.00248838	0.598264
0.000909104	0.479831
0.00416603	0.484071
0.00290542	0.505697
0.00266515	0.451451
0.00210283	0.531262
0.00145803	0.49513
0.00279827	0.587274
0.00168323	0.584938
0.0025663	0.51009
0.00381051	0.4836
0.00281658	0.574088
0.00393155	0.568561
0.00217048	0.526888
0.00149176	0.500071
0.00386265	0.493973
0.00381299	0.539192
0.00187555	0.454239
0.00265876	0.510249
0.00600156	0.564531
0.00160451	0.574859
0.00288738	0.526071
0.00217626	0.435754
0.00146759	0.414184
0.00352413	0.542877
0.0036515	0.483474
0.00229486	0.544536
0.00365559	0.426731
0.0019468	0.525007
0.00284559	0.463004
0.0022032	0.447212
0.00233751	0.530716
0.00215995	0.553935
0.00219902	0.605349
0.00224026	0.454358
0.00286675	0.441931
0.00437986	0.533938
0.00153251	0.567798
0.00388302	0.532321
0.00190222	0.586262
0.00379926	0.436413
0.00158478	0.531327
0.00294297	0.585583
0.00335566	0.551408
0.00538682	0.553468
0.00327855	0.525852
0.00205906	0.475384
0.0037972	0.503067
0.000974298	0.412381
0.00155268	0.548156
0.00429582	0.482599
0.00257584	0.482761
0.00234756	0.56292
0.00158034	0.519527
0.00276137	0.470451
0.00310836	0.559766
0.0042734	0.652004
0.00219574	0.623386
0.00459601	0.600686
0.00219719	0.589495
0.00112821	0.578354
0.00583277	0.59646
0.00447342	0.601026
0.00294623	0.655813
0.0037221	0.500898
0.00235495	0.482085
0.00235075	0.50785
0.00499776	0.536637
0.00185465	0.482231
0.00352297	0.549914
0.00329498	0.454169
0.00156313	0.470442
0.00133025	0.643792
0.00445441	0.667028
0.00409426	0.825018
0.00338397	0.561588
0.00136853	0.350385
0.00518626	0.507457
0.00324519	0.505046
0.0023867	0.587176
0.00326182	0.480992
0.00180232	0.636777
0.00165996	0.52053
0.0034142	0.627066
0.00620252	0.55129
0.00387482	0.633621
0.0027652	0.604381
0.00293224	0.603916
0.00473673	0.521955
0.00251253	0.629275
0.00101266	0.540015
0.00177695	0.536305
0.00201932	0.51138
0.00495578	0.545641
0.00245028	0.526235
0.00463358	0.59016
0.00246602	0.473537
0.00514855	0.52291
0.00245476	0.53963
0.00480032	0.563203
0.00176059	0.593308
0.0010191	0.465814
0.00126519	0.527748
0.00212569	0.55379
0.00213404	0.59058
0.00315125	0.57322
0.0032622	0.678018
0.00216626	0.565187
0.00103958	0.560394
0.00543103	0.531875
0.00271205	0.519951
0.00249969	0.566685
0.00160822	0.41321
0.00397696	0.505805
0.00117668	0.570596
0.00343888	0.466707
0.00159152	0.560109
0.00118093	0.537197
0.00152155	0.641907
0.00289812	0.547417
0.0024972	0.618309
0.00566258	0.552029
0.00133539	0.482235
0.00417697	0.484142
0.00344336	0.486147
0.00202185	0.498501
0.00174938	0.375874
0.00349464	0.538279
0.00377068	0.42692
0.00412401	0.641627
0.00447721	0.471844
0.00225028	0.62661
0.00208616	0.532841
0.00138947	0.422346
0.00173945	0.474443
0.0020046	0.42992
0.00365318	0.540436
0.00540908	0.441735
0.00291754	0.507932
0.00225957	0.657581
0.00347322	0.538133
0.0028768	0.484784
0.00218407	0.595304
0.00215735	0.501724
0.00384782	0.489616
0.00438108	0.576812
0.00376484	0.398457
0.00428492	0.753441
0.00510974	0.464251
0.00410989	0.710643
0.00409528	0.453666
0.00264328	0.490909
0.0030733	0.488519
0.00142932	0.381312
0.0038858	0.493171
0.00294028	0.542066
0.00296535	0.56132
0.00345386	0.52753
0.00154375	0.518863
0.00940795	0.525675
0.00174133	0.507983
0.00444916	0.482852
0.0045187	0.447858
0.00182657	0.476528
0.00392046	0.544132
0.00326895	0.533869
0.00112924	0.454882
0.00722535	0.562291
0.00441493	0.526114
0.00334338	0.567316
0.00512689	0.451405
0.00212937	0.516869
0.00203533	0.557754
0.00282728	0.569847
0.00166089	0.426574
0.00248036	0.484482
0.00337817	0.58332
0.00289275	0.502479
0.00233837	0.514655
0.00345884	0.433035
0.00262912	0.571012
0.0034094	0.60982
0.0033468	0.54085
0.00281569	0.572352
0.00232589	0.426637
0.0012898	0.543118
0.00255938	0.567802
0.00420331	0.52963
0.00244893	0.729611
0.00239008	0.560625
0.00335012	0.555943
0.00198925	0.484742
0.00183017	0.528005
0.00177927	0.553339
0.00209169	0.435379
0.00180741	0.474355
0.00281034	0.539988
0.00208162	0.51624
0.0020038	0.500105
0.00367067	0.530964
0.00324805	0.566031
0.00337789	0.566911
0.00115967	0.51786
0.00265618	0.439726
0.00129563	0.553437
0.00456431	0.442647
0.00197706	0.477286
0.00467378	0.465408
0.00489179	0.467927
0.00410517	0.660773
0.00184827	0.490575
0.0047935	0.461481
0.00389048	0.572068
0.00129399	0.511039
0.0028072	0.588315
0.00230297	0.482266
0.00193633	0.540578
0.00497436	0.66084
0.00386025	0.488977
0.00327677	0.490358
0.00344607	0.605914
0.0040231	0.581619
0.00178518	0.649703
0.00246522	0.599558
0.00193532	0.625626
0.00167387	0.569164
0.00179272	0.653771
0.00358759	0.663132
0.0021737	0.590079
0.000643261	0.566554
0.00181984	0.587021
0.00281272	0.656459
0.00335668	0.755513
0.000992712	0.731365
0.00111576	0.719854
0.00081596	0.683127
0.00149541	0.484648
0.00163228	0.545233
0.00291461	0.589588
0.00288408	0.560295
0.00376237	0.484037
0.00392879	0.64225
0.00118868	0.545456
0.00235772	0.650158
0.00449437	0.626567
0.00341515	0.578043
0.00355848	0.650388
0.00137019	0.669834
0.00196194	0.474344
0.00117071	0.612602
0.00478007	0.590107
0.00307313	0.569532
0.000778313	0.599936
0.00354609	0.636608
0.00428405	0.61094
0.00343295	0.611637
0.0040619	0.562336
0.00331428	0.518807
0.00242246	0.668879
0.00366312	0.558366
0.00288021	0.550446
0.00372042	0.679415
0.00351384	0.533976
