# Supplementary material for: Ligand bias underlies differential signaling of multiple FGFs via FGFR1
Source: eLife. 2024 Apr 3;12:RP88144. doi: 10.7554/eLife.88144 (PMC10990489; doi:10.7554/eLife.88144)
Supplement: Figure 6—source data 2. [file elife-88144-fig6-data2.xlsx]

## Sheet: Sheet1
rec/nm2	Etilda
0.00485013	0.404096
0.0019461	0.449712
0.00416285	0.518559
0.0102533	0.415138
0.00546058	0.426847
0.00295351	0.486487
0.0032523	0.330409
0.00192301	0.545069
0.003795	0.479433
0.00216487	0.400318
0.0060398	0.449615
0.00377483	0.557761
0.00308734	0.349553
0.000933076	0.488893
0.0029386	0.456849
0.00170689	0.444563
0.00411951	0.410645
0.00195772	0.367
0.00296049	0.421307
0.00281888	0.406743
0.00406894	0.396174
0.00215841	0.424586
0.00105168	0.417237
0.00166525	0.403504
0.00363264	0.425781
0.00378948	0.468714
0.00336687	0.448971
0.00129589	0.327903
0.00377861	0.39952
0.00174408	0.331485
0.00310419	0.393407
0.000879904	0.359694
0.00143665	0.317286
0.00281583	0.410712
0.00246872	0.433839
0.0028646	0.441493
0.00168565	0.434588
0.00380599	0.498704
0.0013471	0.353306
0.00267925	0.486394
0.00158946	0.382928
0.0025377	0.527841
0.00648914	0.377308
0.0024903	0.406336
0.00420251	0.382873
0.0042094	0.538371
0.00354406	0.471661
0.00750507	0.434289
0.00425549	0.51224
0.00261314	0.456132
0.00365289	0.402397
0.00166819	0.294534
0.00618271	0.36453
0.00194426	0.384711
0.00270451	0.436281
0.00463561	0.408511
0.00657458	0.403206
0.00349322	0.437841
0.00188839	0.409027
0.00291086	0.40622
0.00423434	0.411267
0.00127824	0.456113
0.00396796	0.548256
0.00212258	0.321951
0.00356205	0.489057
0.00387262	0.415122
0.0029732	0.367453
0.00423515	0.428218
0.000886993	0.421765
0.0040723	0.382802
0.00147148	0.368253
0.00170516	0.431513
0.00197138	0.395667
0.00319457	0.459034
0.00287077	0.469864
0.00296005	0.598854
0.00305875	0.369587
0.00278662	0.418853
0.00476421	0.36128
0.0025569	0.38494
0.00283167	0.301197
0.00563074	0.397068
0.00381551	0.504122
0.00245622	0.396591
0.00399709	0.464137
0.00247486	0.402055
0.00552112	0.438472
0.00189118	0.402123
0.00235528	0.458202
0.00424096	0.410078
0.00453104	0.366166
0.00278898	0.543138
0.0027473	0.41751
0.00204206	0.432572
0.00350403	0.388542
0.0035495	0.435708
0.0043387	0.397299
0.00465815	0.41261
0.00443558	0.482164
0.0043802	0.36949
0.00385842	0.415425
0.00229744	0.464503
0.00176662	0.455038
0.0034012	0.43885
0.00491487	0.342637
0.00428605	0.439948
0.00263758	0.391242
0.00286826	0.400542
0.00369048	0.445483
0.00360328	0.324021
0.00238278	0.430423
0.00415749	0.388901
0.00284348	0.414471
0.00330501	0.42259
0.00274934	0.40506
0.00172651	0.385977
0.00235978	0.491069
0.00258326	0.457638
0.00548266	0.471535
0.00229716	0.464658
0.00308557	0.387233
0.00440255	0.463245
0.00406704	0.448934
0.000619899	0.423026
0.00200791	0.351789
0.00364724	0.413427
0.00309763	0.48119
0.00383021	0.383227
0.00417377	0.36823
0.00257456	0.472254
0.00468527	0.411514
0.00246554	0.362715
0.00347687	0.397782
0.00200753	0.48617
0.00438096	0.452031
0.00306842	0.447063
0.000997006	0.33772
0.00409847	0.367619
0.00395961	0.439692
0.00420564	0.318242
0.00270468	0.385463
0.00251418	0.367796
0.0030643	0.326093
0.00193201	0.403286
0.00374817	0.417211
0.00375987	0.491695
0.00296517	0.445703
0.00205662	0.466715
0.00304514	0.52671
0.00299882	0.473761
0.00273413	0.53629
0.00207417	0.393098
0.00454721	0.5446
0.00194109	0.308256
0.00367136	0.413164
0.00233511	0.544902
0.00119481	0.464326
0.00289013	0.494255
0.00288312	0.458437
0.00417665	0.369612
0.00374483	0.511291
0.00433487	0.355753
0.00295541	0.374869
0.0067248	0.452665
0.00467336	0.402714
0.00187551	0.400571
0.00218969	0.426699
0.00397865	0.42763
0.00242009	0.360175
0.00200119	0.44379
0.00376305	0.393291
0.00158652	0.375592
0.00247214	0.363413
0.00493092	0.39091
0.00281501	0.496418
0.0025367	0.383333
0.00350959	0.405268
0.00164947	0.417582
0.00219717	0.393443
0.00482672	0.417005
0.00282679	0.546556
0.00531895	0.392379
0.0024077	0.368798
0.00399244	0.487531
0.00279336	0.469778
0.00310287	0.459573
0.00179427	0.343363
0.00269901	0.492673
0.00406907	0.521248
0.0017627	0.445958
0.00326339	0.534981
0.00290312	0.493261
0.00387276	0.496722
0.00325846	0.393171
0.00482041	0.434972
0.00370486	0.349315
0.00262066	0.439893
0.00273508	0.551753
0.00406924	0.41505
0.00218201	0.39083
0.00234142	0.371931
0.00317531	0.393837
0.00416968	0.390427
0.0066283	0.386341
0.00467298	0.472294
0.00272161	0.33973
0.00340434	0.437184
0.00167574	0.418809
0.00349627	0.476008
0.00180178	0.483844
0.00268201	0.429213
0.00259411	0.461403
0.00255937	0.491007
0.00355836	0.341775
0.00166016	0.315716
0.000939018	0.396612
0.00434338	0.403332
0.00403207	0.348266
0.00184997	0.339849
0.00356557	0.422147
0.00369359	0.47755
0.00333467	0.420709
0.00324616	0.383895
0.00324324	0.485456
0.00289343	0.462493
0.00272905	0.428234
0.00271613	0.34395
0.00215837	0.485936
0.00339312	0.318389
0.00187628	0.33032
0.00388769	0.383654
0.00402303	0.396183
0.00449868	0.370524
