# Supplementary material for: Ligand bias underlies differential signaling of multiple FGFs via FGFR1
Source: eLife. 2024 Apr 3;12:RP88144. doi: 10.7554/eLife.88144 (PMC10990489; doi:10.7554/eLife.88144)
Supplement: Figure 6—source data 3. [file elife-88144-fig6-data3.xlsx]

## Sheet: Sheet1
rec/nm2	Etilda
0.00204991	0.468974
0.00453075	0.466302
0.00113509	0.531116
0.000729844	0.626142
0.00383967	0.448332
0.000839276	0.48846
0.00199291	0.447609
0.00283904	0.499752
0.00302629	0.363827
0.00179218	0.481371
0.00351388	0.572273
0.00237964	0.447234
0.00462169	0.380358
0.00139801	0.371888
0.00468461	0.420127
0.00226193	0.465243
0.000882975	0.451266
0.00361161	0.545679
0.00286446	0.474854
0.00384945	0.495863
0.00305152	0.499875
0.00345859	0.496422
0.00356477	0.451399
0.00124521	0.367771
0.00204647	0.522152
0.00177839	0.379499
0.00264616	0.573978
0.00191161	0.446656
0.00112551	0.54411
0.00285484	0.495079
0.00353785	0.624244
0.00647103	0.517917
0.000780377	0.575135
0.00311257	0.37985
0.00135298	0.475537
0.00183131	0.466608
0.00101928	0.327847
0.00166158	0.570222
0.00209908	0.461207
0.00115839	0.399846
0.0019908	0.446269
0.00200481	0.567135
0.00147656	0.488262
0.00284504	0.417754
0.00219572	0.469258
0.00277269	0.484172
0.00288676	0.490596
0.000703087	0.459561
0.00246805	0.49759
0.0031697	0.49976
0.00483238	0.520883
0.00334927	0.533133
0.00259634	0.468431
0.00479801	0.524738
0.000631894	0.353115
0.000948886	0.561096
0.00209799	0.503184
0.000741919	0.550869
0.00162453	0.593965
0.00233762	0.463902
0.00371215	0.484942
0.00661643	0.465591
0.00111548	0.416515
0.00225767	0.487978
0.00183153	0.467055
0.000629755	0.528204
0.00173315	0.428695
0.00138754	0.509947
0.0019603	0.439284
0.00173474	0.488098
0.00409782	0.385745
0.00103676	0.44052
0.000979034	0.476588
0.00116091	0.521762
0.00197901	0.453244
0.00123848	0.44753
0.00280544	0.359186
0.00246382	0.49242
0.00337319	0.410252
0.00561488	0.399113
0.00263692	0.494637
0.0019107	0.406465
0.00464038	0.425485
0.00566013	0.634903
0.00128888	0.566313
0.00443274	0.478936
0.00164783	0.494646
0.00275788	0.460675
0.00294518	0.440583
0.00153739	0.547752
0.00115072	0.484006
0.00407322	0.41908
0.00391667	0.648737
0.00153684	0.486673
0.000915348	0.474766
0.00523482	0.488704
0.00381862	0.5099
0.00471315	0.424477
0.00175791	0.546322
0.00232489	0.51833
0.00161894	0.538296
0.00424276	0.542405
0.000685998	0.471387
0.00140453	0.515688
0.00162942	0.502052
0.000957702	0.55556
0.00205487	0.510723
0.00286812	0.555891
0.00449793	0.530531
0.00170074	0.621307
0.00504568	0.554773
0.0031175	0.507613
0.00238029	0.424728
0.00441028	0.556737
0.00175224	0.622963
0.00436059	0.557565
0.00147218	0.526532
0.00208626	0.447655
0.00169707	0.546373
0.00349873	0.503828
0.00228452	0.504577
0.00411423	0.432348
0.00227501	0.467672
0.00328491	0.54827
0.0020077	0.434053
0.00424408	0.419447
0.00234644	0.601082
0.00251543	0.426883
0.000834519	0.484404
0.00441323	0.507738
0.00182399	0.441807
0.00489523	0.437179
0.00257953	0.446072
0.00513505	0.582575
0.00191784	0.422067
0.00404731	0.405634
0.00481383	0.465553
0.00417314	0.563283
0.00247605	0.511845
0.00188363	0.635461
0.00308339	0.497698
0.0042105	0.417952
0.00294471	0.486136
0.00564148	0.432436
0.00561674	0.44849
0.0012462	0.476488
0.00108948	0.500737
0.00435999	0.445945
0.00402119	0.59313
0.00486593	0.492829
0.00440785	0.460202
0.00289823	0.433522
0.00200795	0.451462
0.00696179	0.399375
0.00367726	0.490891
0.0026127	0.477185
0.00204691	0.50857
0.00132342	0.501142
0.00670852	0.44016
0.00166432	0.572537
0.00433254	0.424213
0.00302986	0.579946
0.00273735	0.419183
0.00254273	0.523386
0.00229385	0.312967
0.00290196	0.496221
0.00292788	0.547318
0.00201376	0.592035
0.00185054	0.687399
0.00176175	0.410577
0.00221402	0.573963
0.00433757	0.539674
0.00175867	0.594735
0.00191816	0.561992
0.00298151	0.656426
0.00314076	0.561833
0.00238335	0.544371
0.00265602	0.51027
0.00251263	0.507186
0.00167038	0.580885
0.00122731	0.433561
0.00133796	0.465346
0.00320828	0.519547
0.00092009	0.588983
0.00224585	0.612903
0.00161702	0.436847
0.00230883	0.607213
0.00251311	0.400433
0.00243753	0.554842
0.00150043	0.58771
0.00269151	0.603392
0.0011972	0.566717
0.00160632	0.579911
0.00269962	0.514758
0.00182899	0.551295
0.0028641	0.63356
0.00306694	0.552097
0.00233888	0.542762
0.00429587	0.632867
0.00266335	0.773318
0.0026514	0.644756
0.00186552	0.699793
0.000831984	0.495348
0.000846307	0.652172
0.00344193	0.635533
0.00119074	0.644982
0.00343928	0.626198
0.00285416	0.736218
0.00411481	0.647922
0.0038768	0.633013
0.00148317	0.632877
0.000954504	0.645006
0.00111286	0.647982
0.00126747	0.729677
0.00323366	0.689926
0.0012419	0.559954
0.000968157	0.505074
0.00157719	0.65228
0.00295908	0.625378
0.00177154	0.648132
0.00417167	0.583668
0.00381888	0.57252
0.00540297	0.532537
0.00453309	0.614047
0.00374767	0.65062
0.00201949	0.569211
0.00226484	0.57541
0.00211006	0.661251
0.00282378	0.605218
0.00559797	0.617484
0.00124235	0.655231
0.00181613	0.62425
0.00103663	0.676546
0.00187728	0.615402
0.00227817	0.552473
0.00384403	0.669583
0.0019288	0.572943
0.00417746	0.689405
0.00261064	0.605948
0.00282279	0.670185
0.0028115	0.66039
0.00437854	0.584313
0.00230054	0.701545
0.0011247	0.609862
0.00337407	0.534549
0.00146828	0.600914
0.00165774	0.635314
0.00255143	0.743287
0.00182529	0.649259
0.00152545	0.719827
0.00268728	0.552667
0.0040462	0.745618
0.00107598	0.631715
0.00347781	0.624964
0.00237271	0.598386
0.00356462	0.599705
0.00192542	0.576461
0.00357642	0.656665
0.00397565	0.556625
0.00295691	0.650337
0.00257533	0.578495
0.00226066	0.553041
0.00224871	0.556294
0.00220356	0.6174
0.00248638	0.569299
0.00080246	0.564192
0.00167594	0.511113
0.00225959	0.602793
0.00517151	0.585005
0.00176592	0.567347
0.00164487	0.525285
0.00380597	0.585691
0.0013756	0.568997
0.00190531	0.476105
0.00241837	0.599026
0.00128259	0.53012
0.00290674	0.481117
0.00262763	0.613477
0.00129673	0.544426
0.00495661	0.628555
0.00163524	0.464446
0.00151789	0.530739
0.00164155	0.480748
